# Supplementary material
Source: PubMed Central journal article supplement (PMC5177991)
Supplement: NIHMS794414-supplement-PRoXe_Supplemental.pdf [file NIHMS794414-supplement-PRoXe_Supplemental.pdf]

Supplemental Data

A

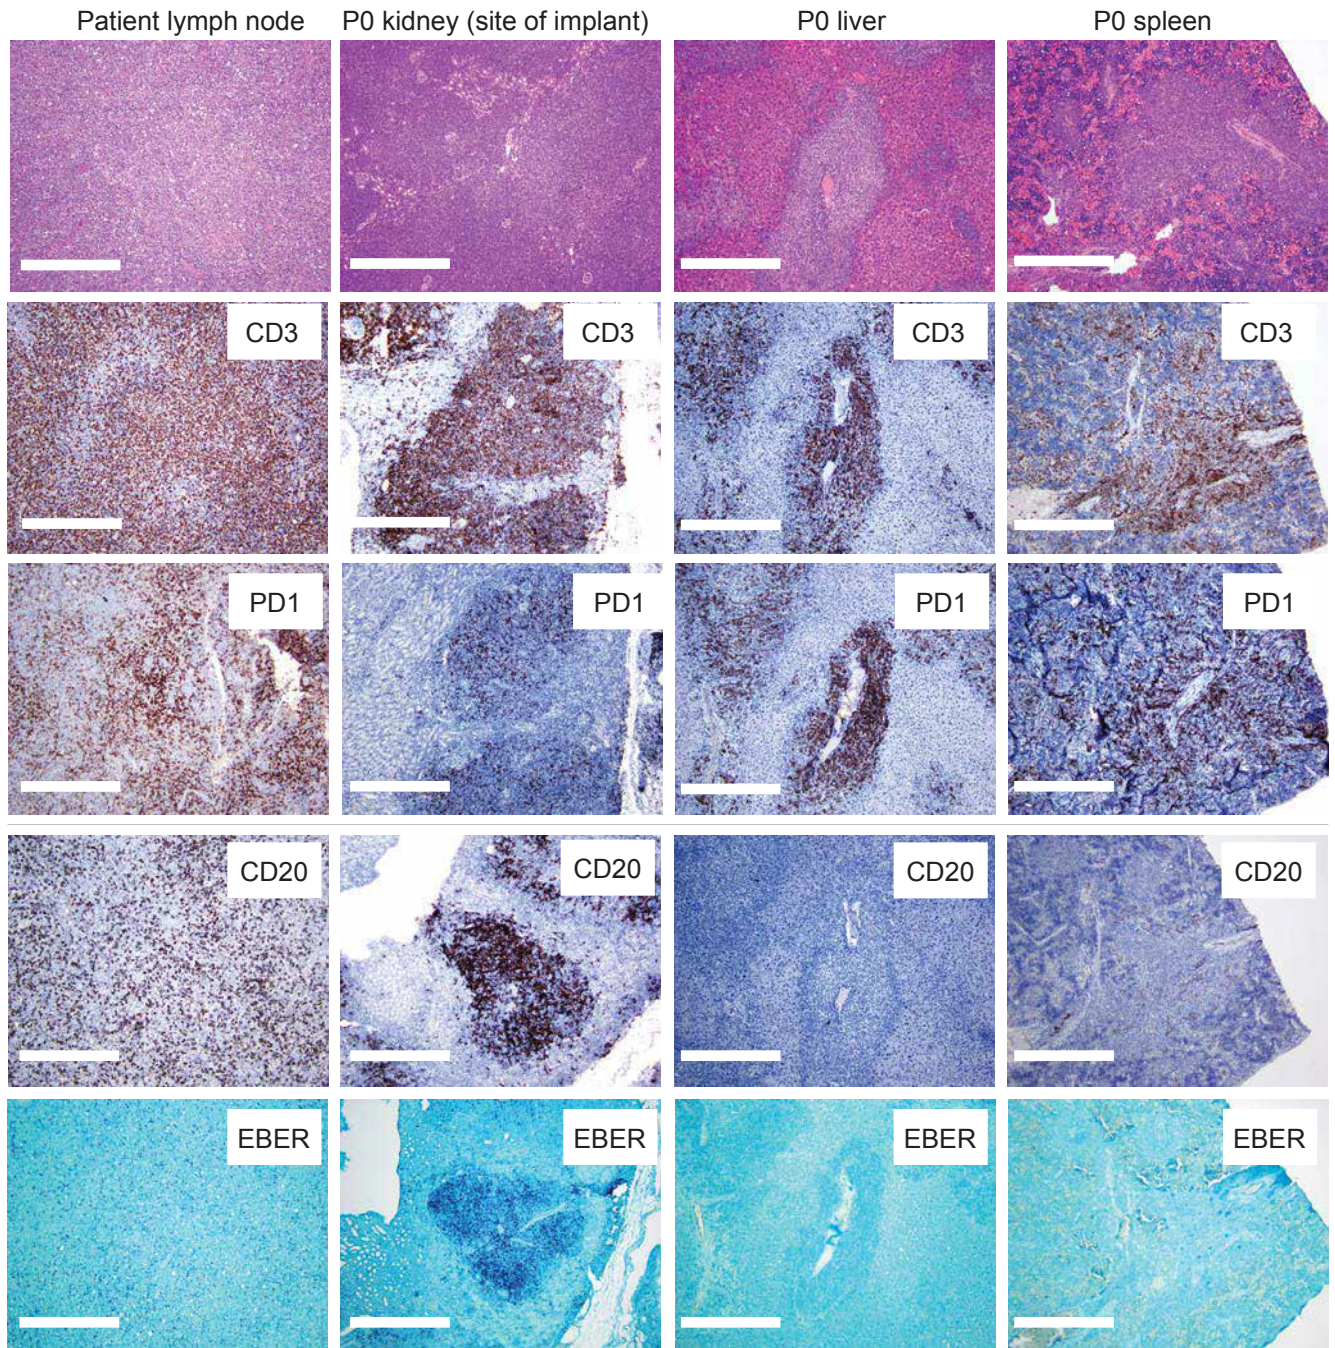

B

Patient lymph node biopsy

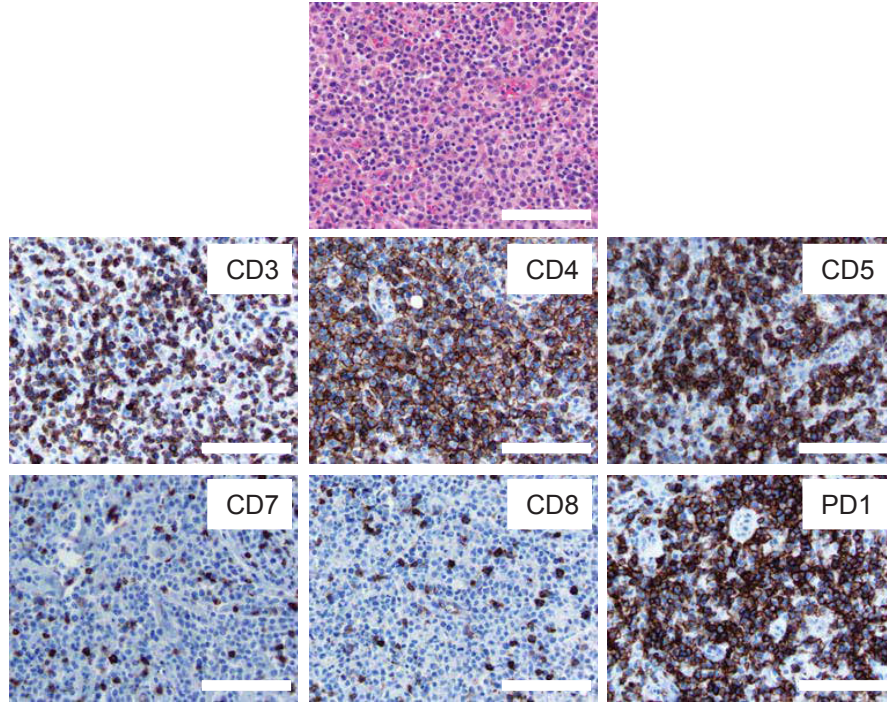

P1 spleen

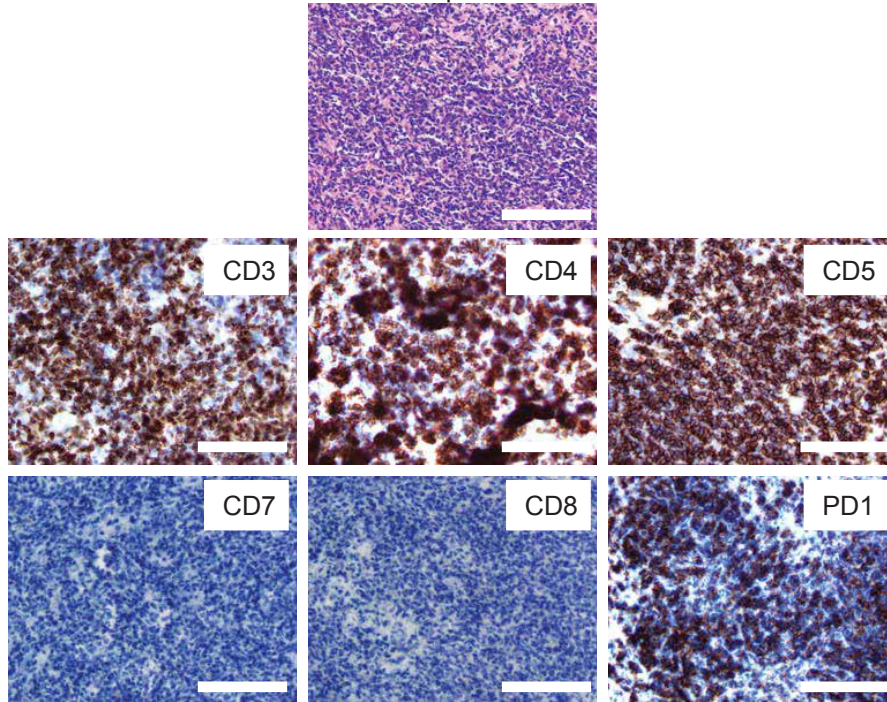

Patient Sample

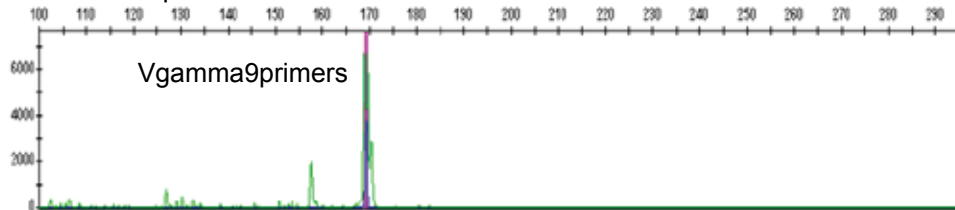

DFTL94393 P1 (spleen)

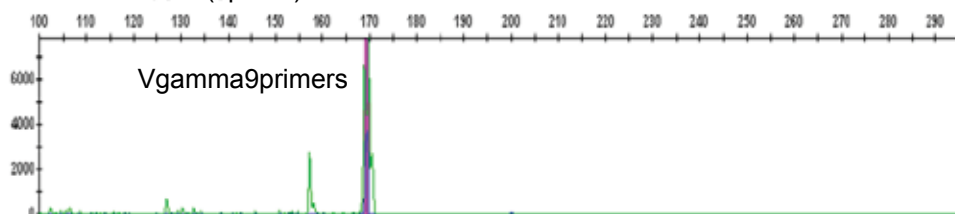

C

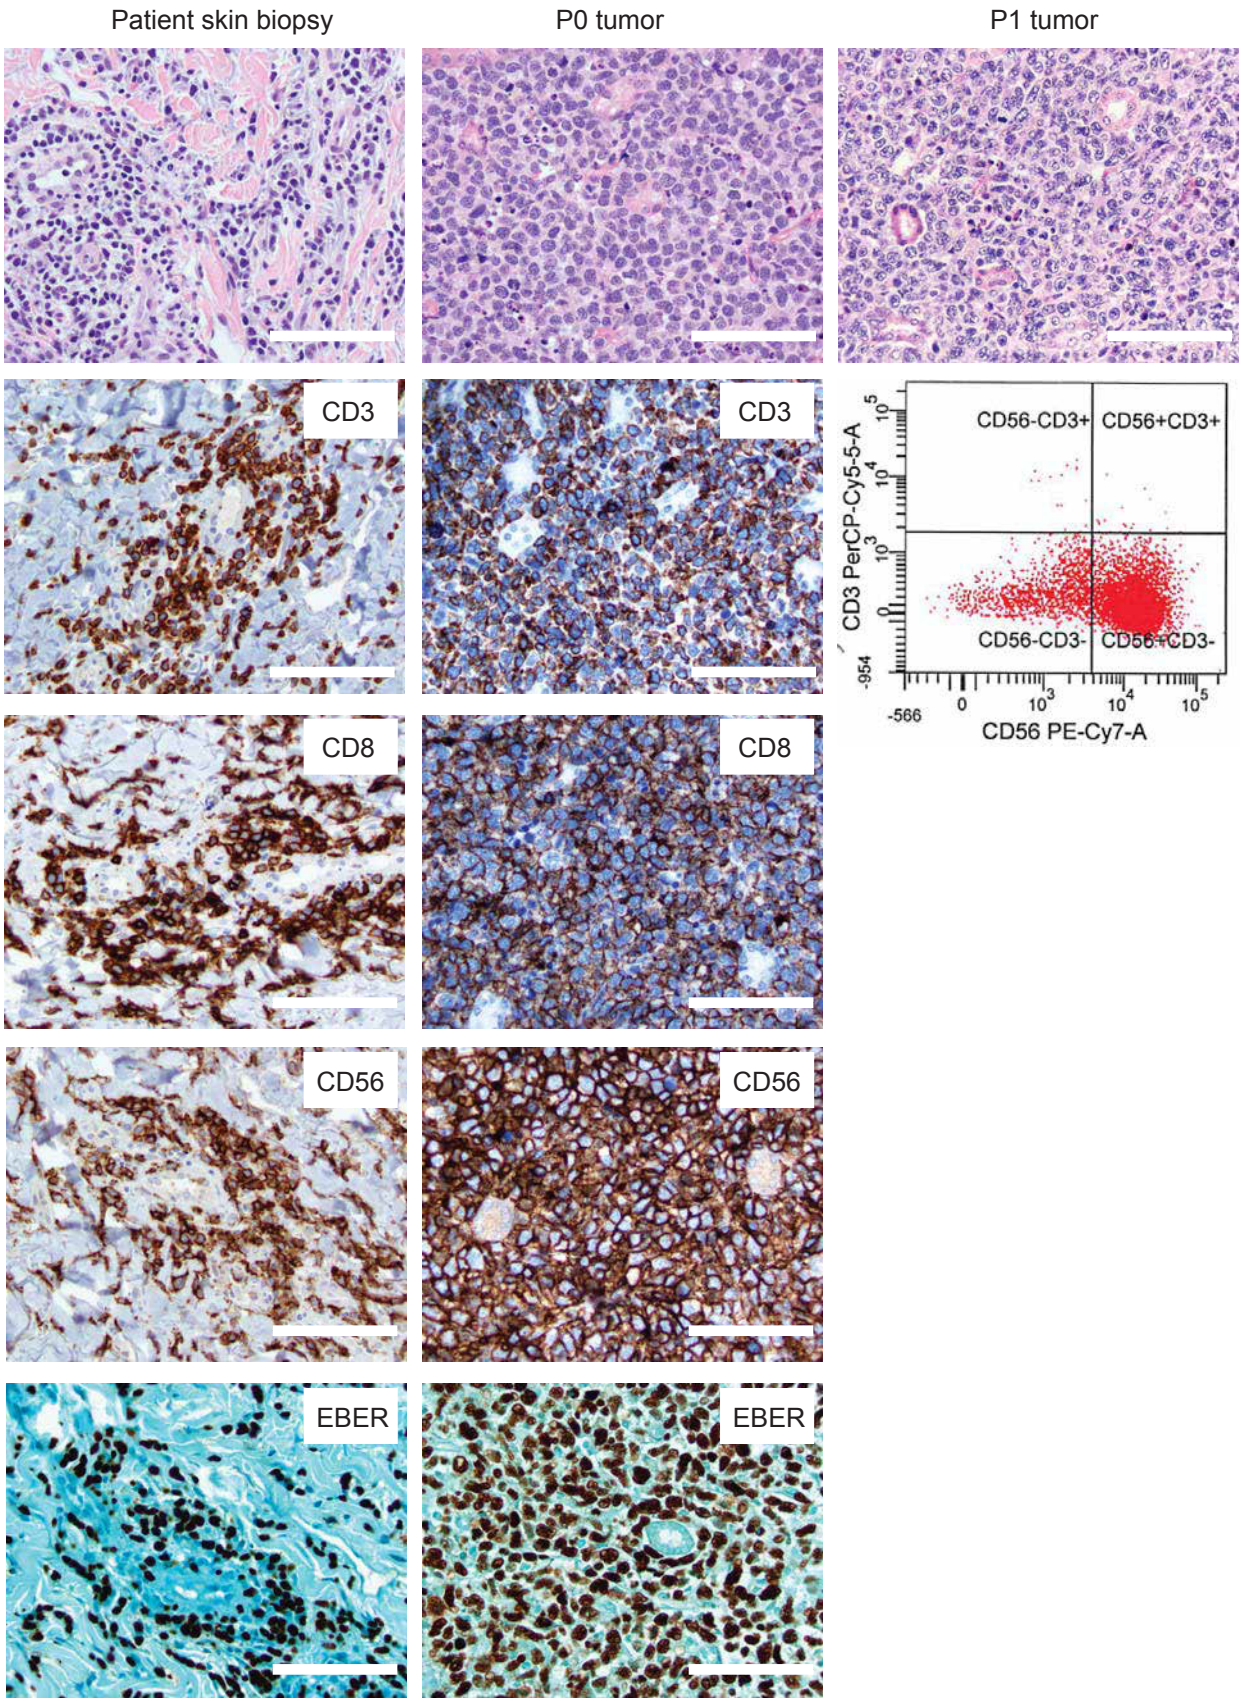

D

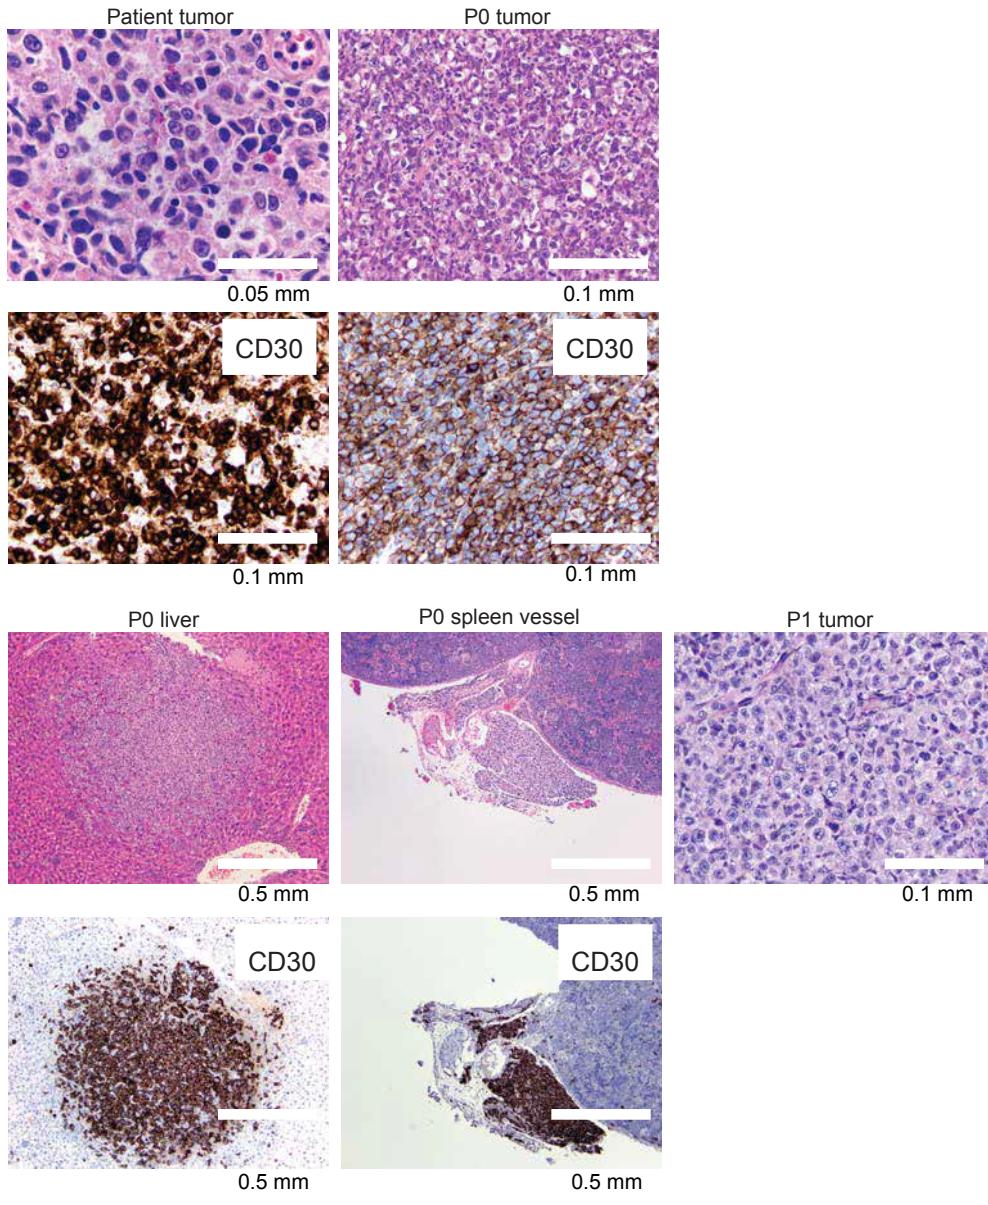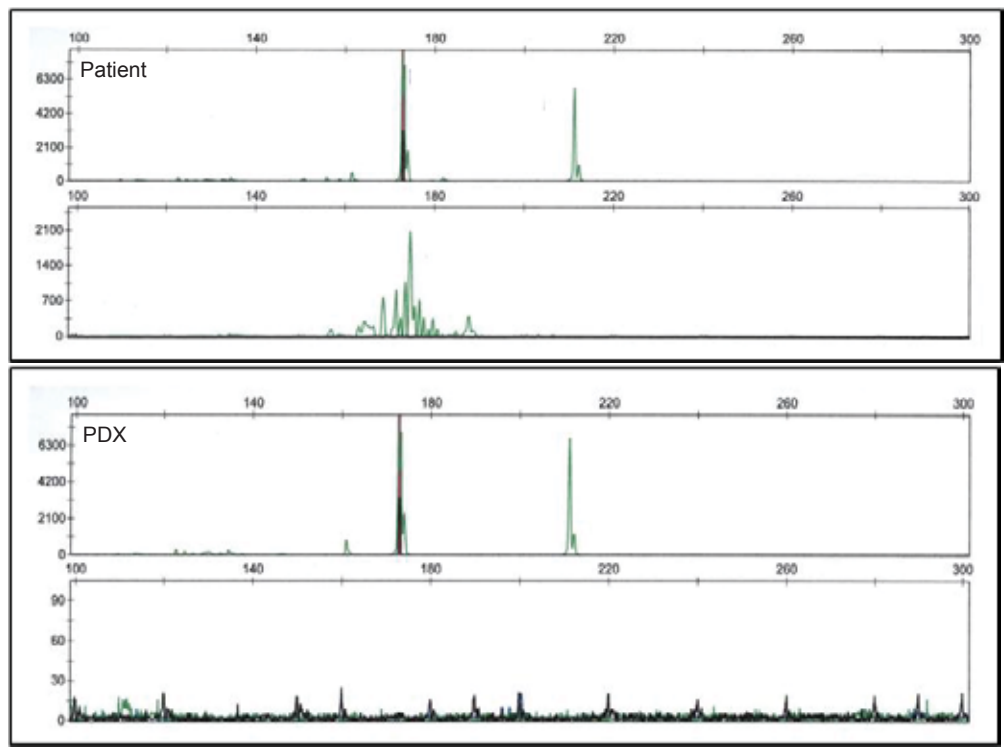

E

Patient lymph node

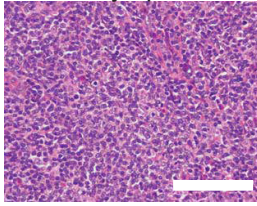

P0 spleen

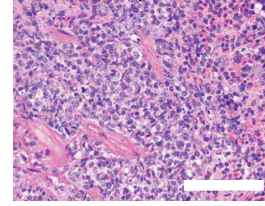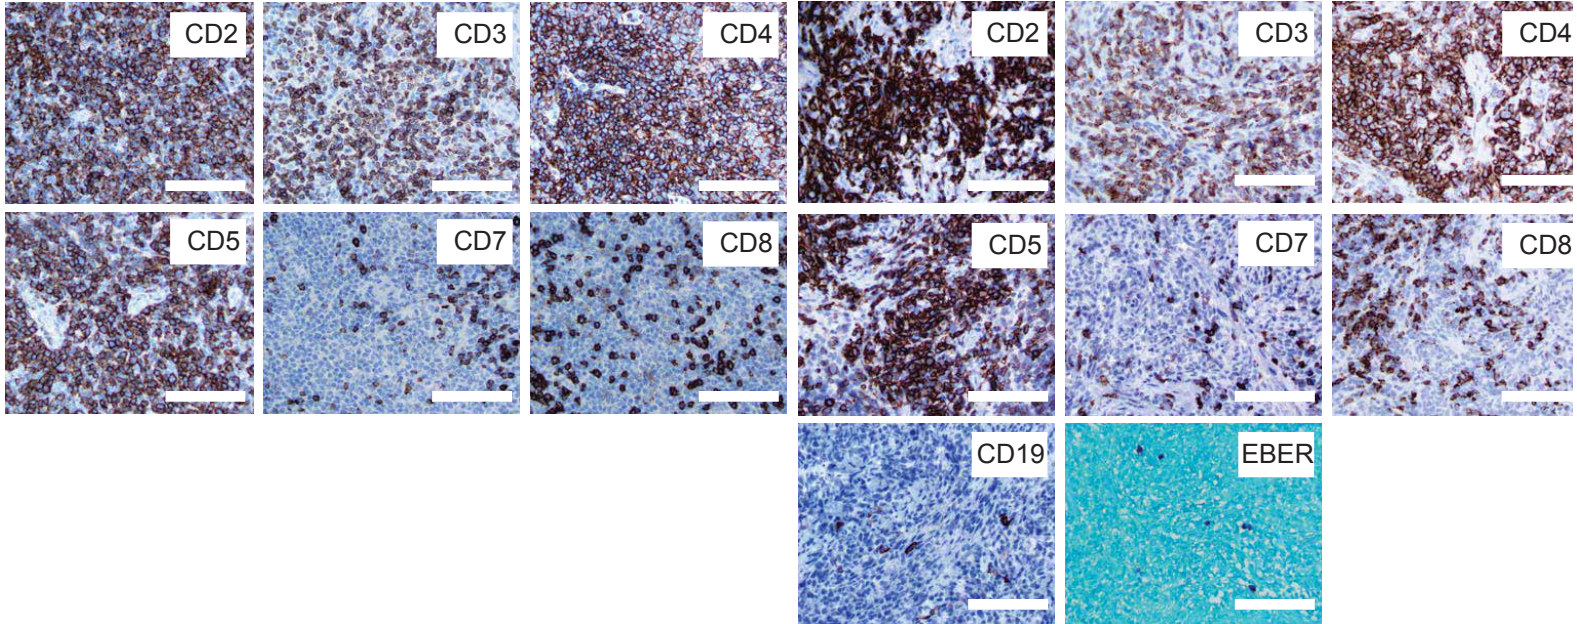

Patient sample

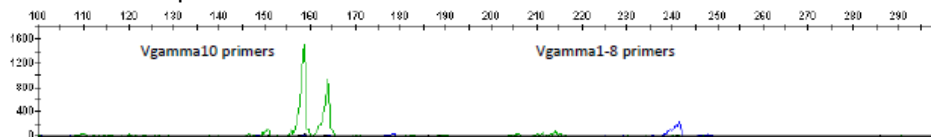

DFTL31208 PO (spleen)

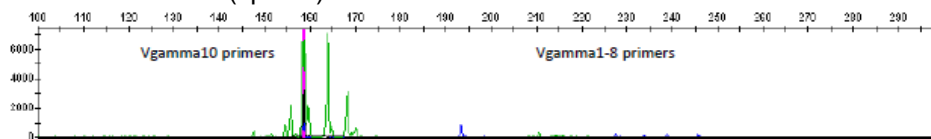

Patient sample

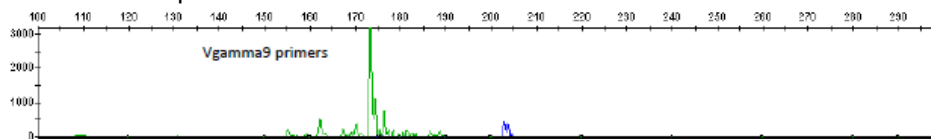

DFTL31208 PO (spleen)

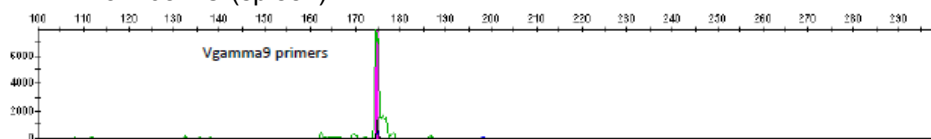

F

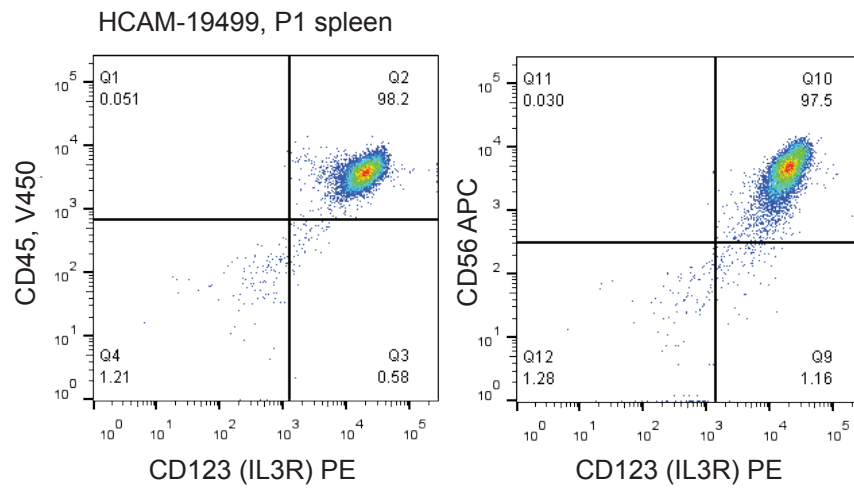

G

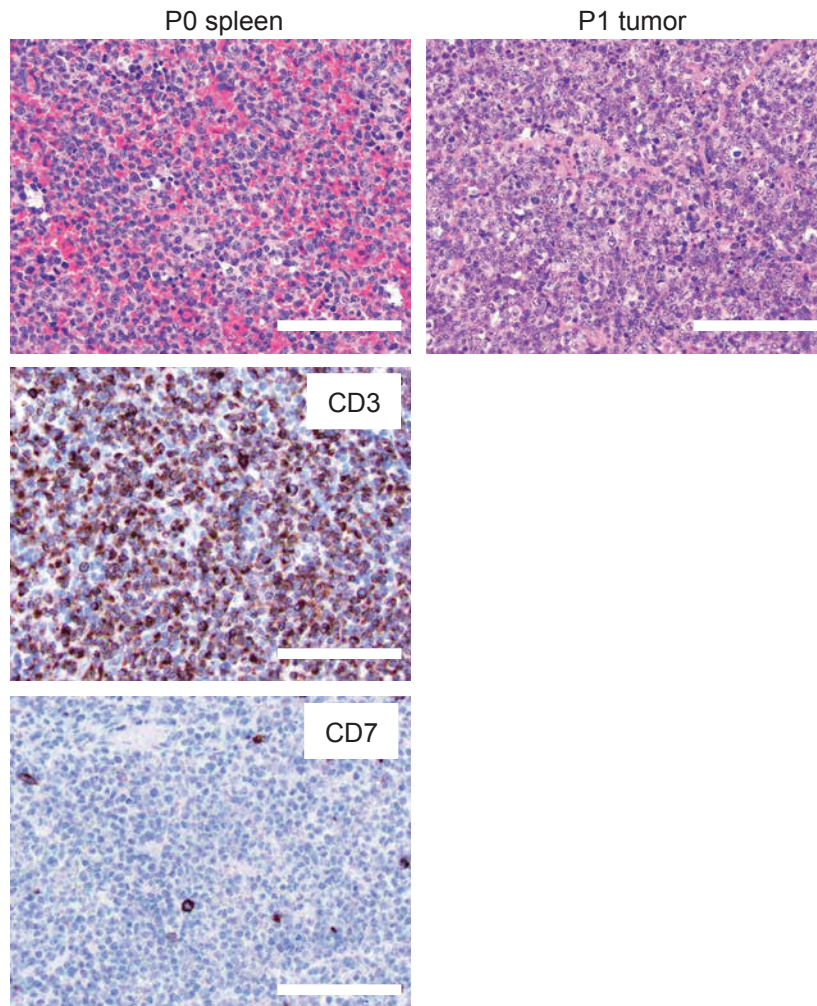

H

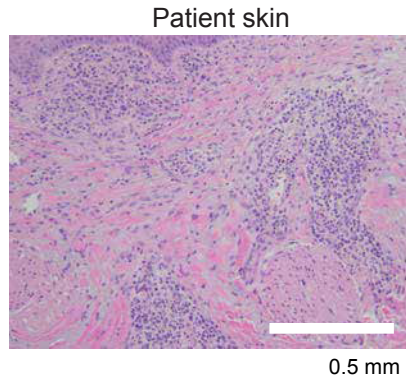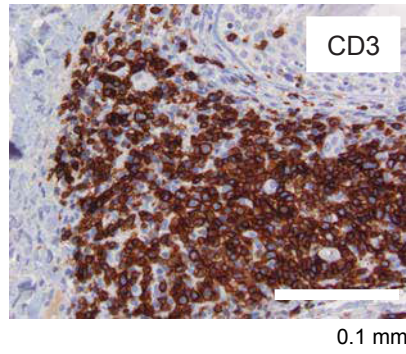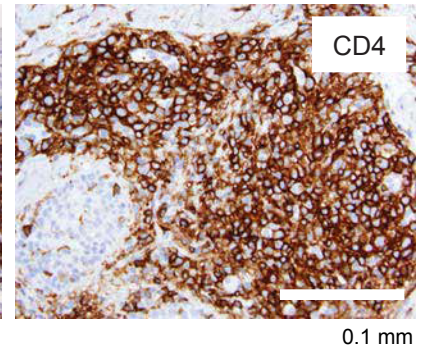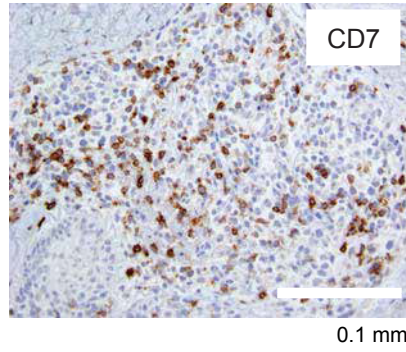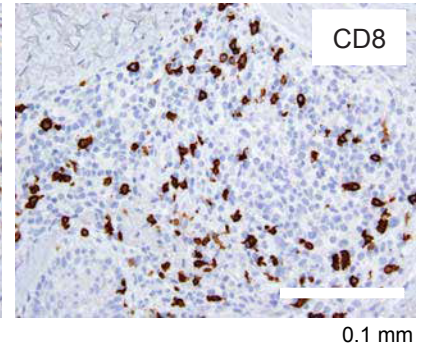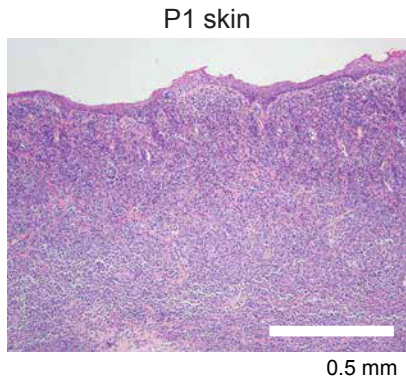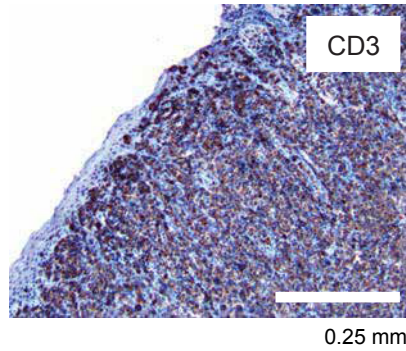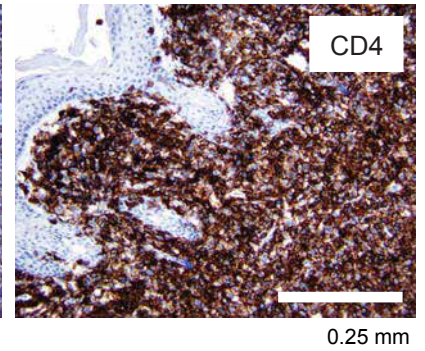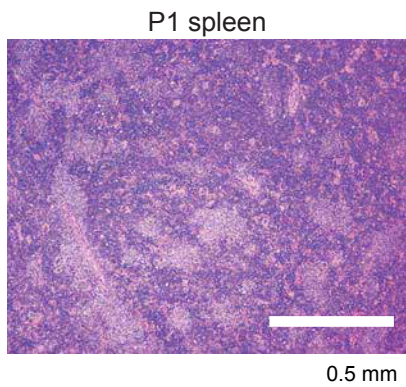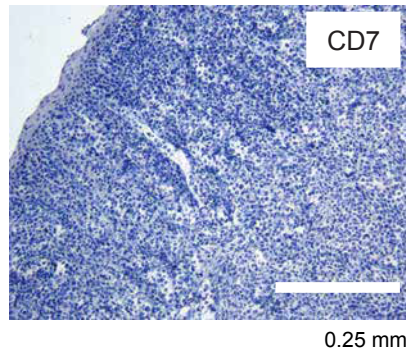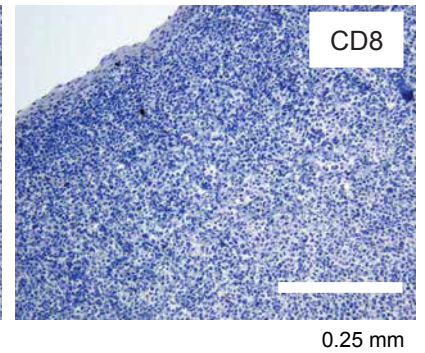

I

Patient lymph node

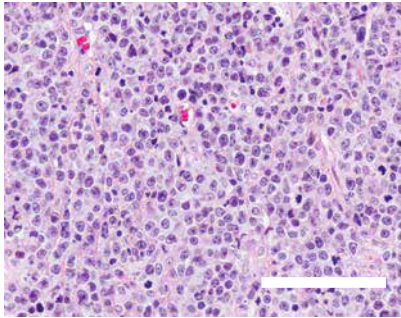

0.1 mm

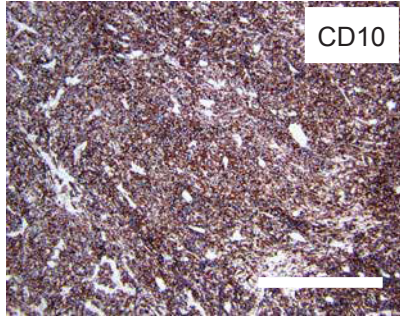

CD10

0.5 mm

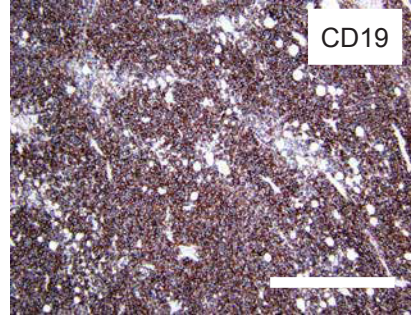

CD19

0.5 mm

P0 tumor

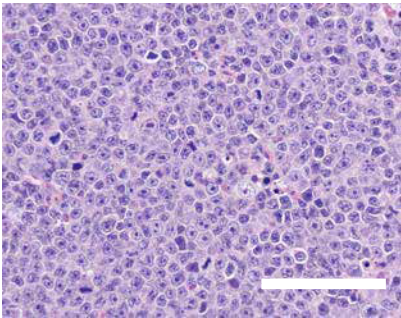

0.1 mm

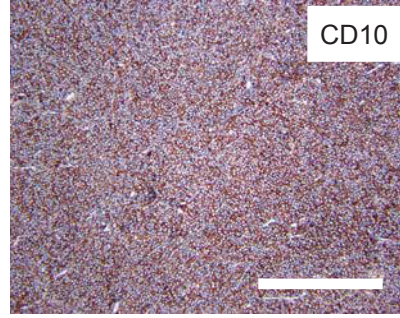

CD10

0.5 mm

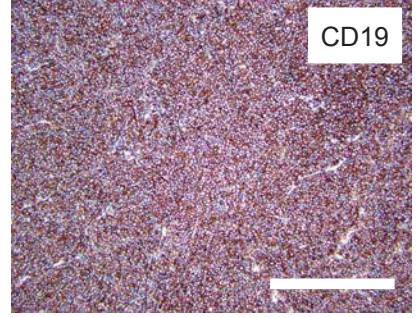

CD19

0.5 mm

P1 tumor

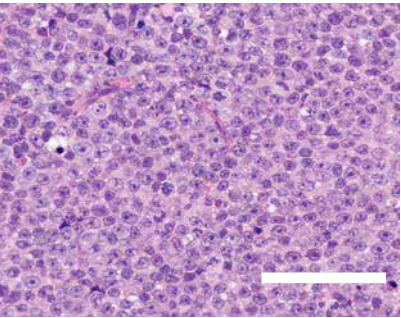

0.1 mm

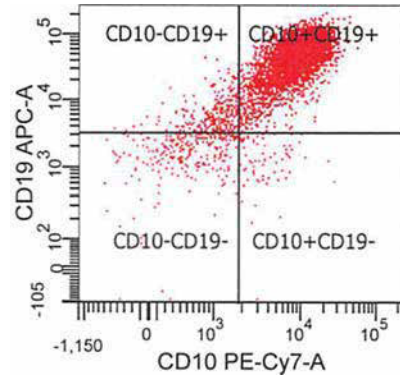

P2 brain

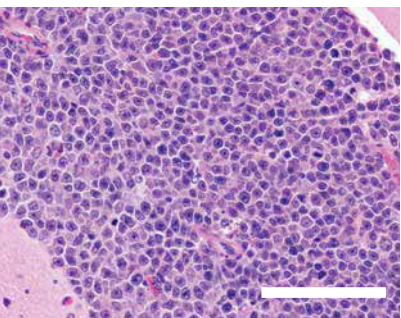

0.1 mm

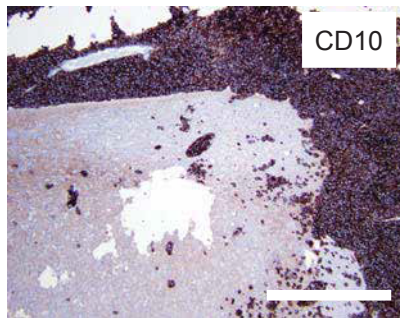

CD10

0.5 mm

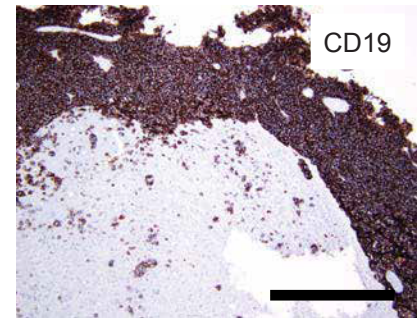

CD19

0.5 mm

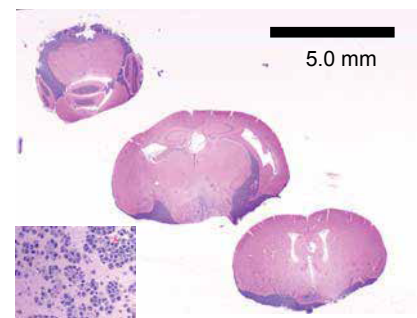

5.0 mm



J

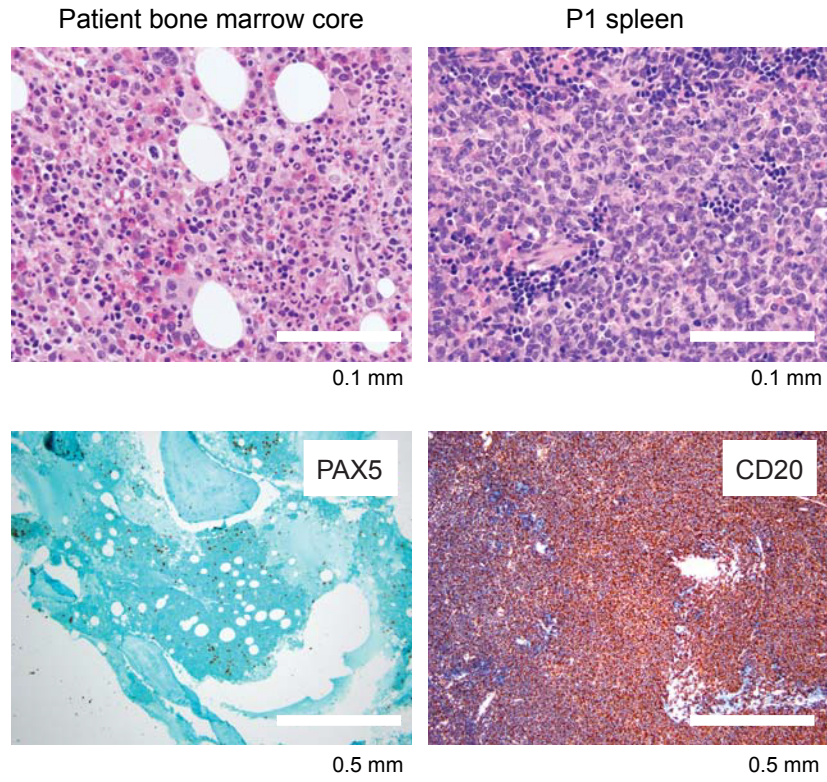

K

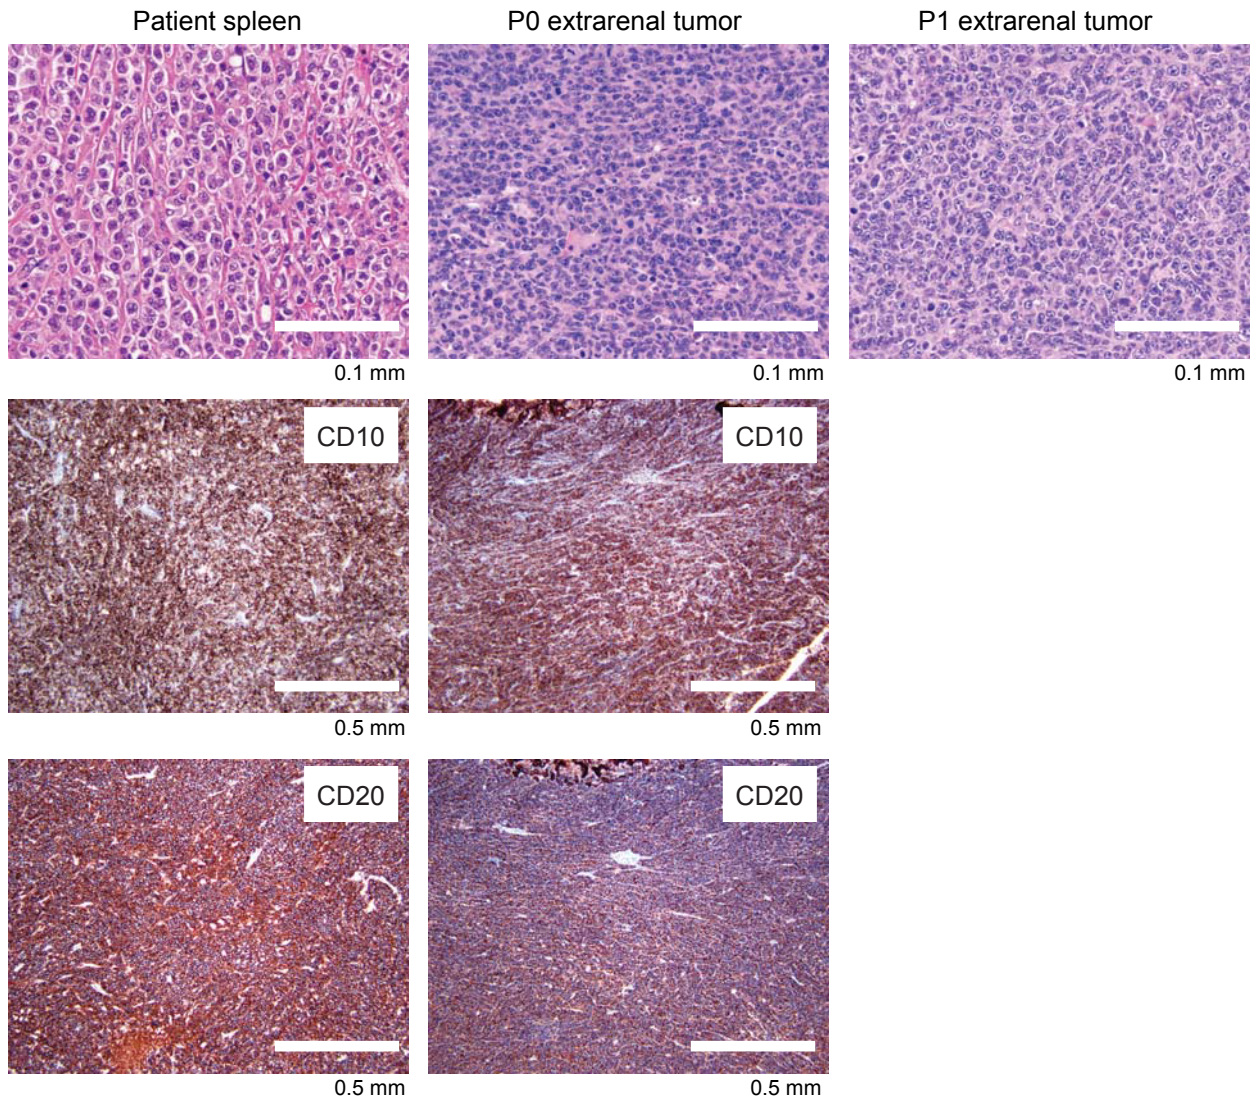

L

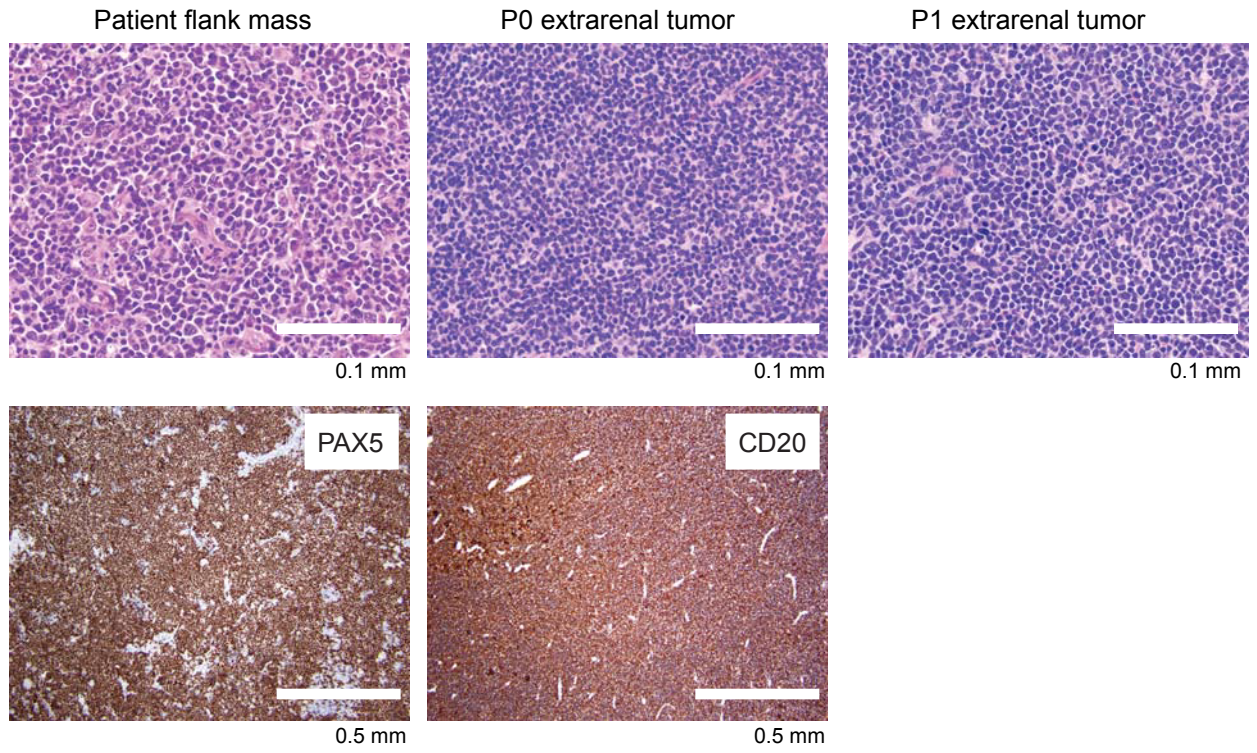

M

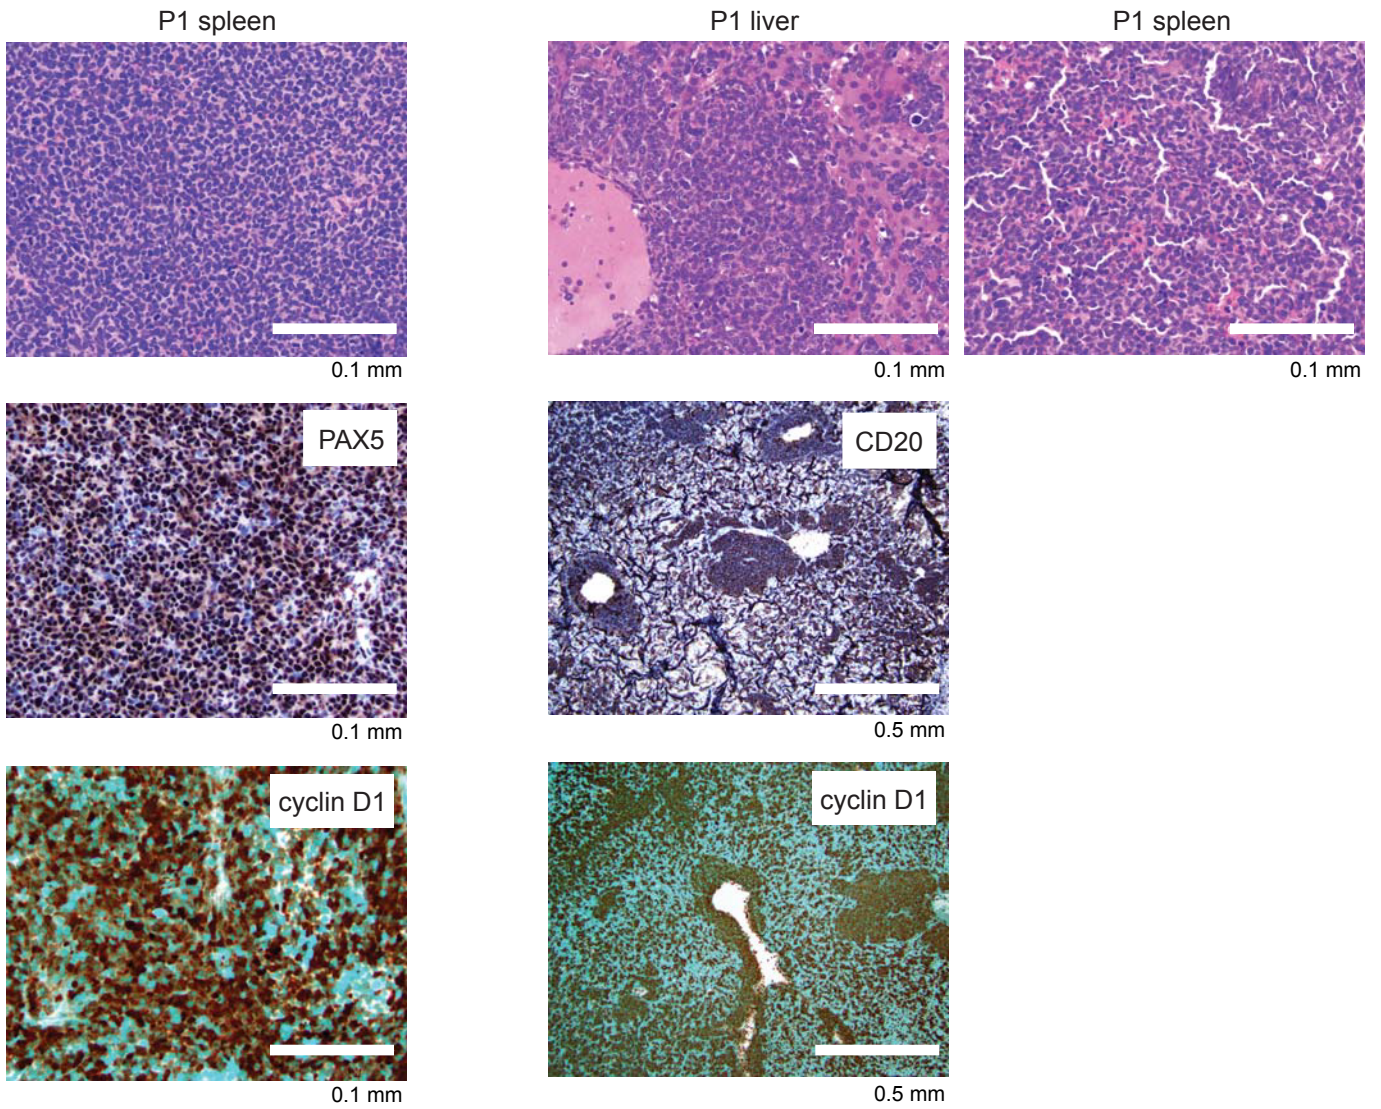

**Figure S1, refers to Table 1.** Phenotypic characterization of xenografts.

**(A)** Angioimmunoblastic T-cell lymphoma xenograft TL-37237 includes an expanded population of EBV-positive B cells. Top 3 rows: The patient lymph node demonstrated involvement by angioimmunoblastic T-cell lymphoma, characterized by a diffuse infiltrate of small to intermediate-sized atypical CD3-positive T cells with co-expression of PD-1. An infiltrate of morphologically- and immunophenotypically-identical cells was detected in the P0 PDX kidney (site of tumor implant), as well as at distant sites (liver and spleen). Bottom 2 rows: An expanded population of EBV-positive immunoblasts, as highlighted by CD20 and in situ hybridization for EBV-encoded RNA (EBER ISH), was also detected in the patient tumor, a common feature in angioimmunoblastic T-cell lymphoma. This population of EBV-positive B cells formed aggregates in the P0 PDX kidney at the site of tumor implant, but did not spread to the spleen or liver along with the neoplastic T-cell component. All scale bars 0.5 mm.

**(B)** TL-94393 carries similar histology and identical T cell receptor rearrangement. Hematoxylin and Eosin (H&E) is shown for the patient's original lymph node biopsy and the spleen of a representative mouse with involvement in P1. Nonmalignant CD7<sup>+</sup> and CD8<sup>+</sup> T cells in the original biopsy are absent in the P1 xenograft. (Below) PCR analysis revealed identical T-cell receptor gene rearrangements in the patient sample and the PDX. Scale bars represent 0.1 mm.

**(C)** Histology of extranodal NK/T-cell lymphoma (TL-85005). Left column: The patient skin biopsy demonstrated an extensive angiocentric and periadnexal infiltrate of intermediate-sized lymphoid cells with irregular nuclei, vesicular chromatin, variably prominent nucleoli and moderate amounts of cytoplasm. Immunophenotyping revealed a profile indicative of extranodal NK/T-cell lymphoma, including expression of cytoplasmic CD3, CD8 and CD56, and reactivity for EBER ISH. Additional 2 columns: Morphologic and immunophenotypic evaluation of P0 and P1 PDX mice demonstrated identical features, including characteristic lack of surface CD3 expression in the expanded population of CD56-positive cells by flow cytometry. Scale bars represent 0.1 mm.

**(D)** Breast-implant associated Anaplastic Large Cell Lymphoma (TL-51398). The patient tumor was composed of large-sized cells with pleomorphic nuclei, vesicular chromatin, prominent nucleoli and moderate amounts of eosinophilic cytoplasm which were strongly positive for CD30. Evaluation of the P0 PDX revealed morphologically and immunophenotypically-identical cells at the site of tumor implant as well as in the liver (forming discrete nodules) and in the perisplenic vessels. The P1 PDX tumor maintained the anaplastic morphology. (Below) PCR analysis revealed identical T-cell receptor gene rearrangements in the patient sample and the PDX. Scale bars describe measurements indicated on each panel.

**(E)** Peripheral T-cell Lymphoma, Not Otherwise Specified (TL-31208). The patient lymph node was effaced by an infiltrate of intermediate to large-sized lymphoid cells with irregular nuclear contours, variably condensed chromatin, distinct nucleoli and small amounts of cytoplasm. Immunophenotyping revealed a CD4-positive T-cell infiltrate with intact expression of CD3 and CD5 and loss of CD7. CD7 and CD8 highlighted background admixed small, reactive T cells. Evaluation of the PDX revealed splenic involvement by a morphologically and immunophenotypically-identical tumor. In addition, scattered CD19-positive B cells of human origin with EBER in situ hybridization reactivity grew in the background of the tumor and the P0 xenograft. PCR analysis revealed identical T-cell receptor gene rearrangements in the patient sample and the PDX. Scale bars represent 0.1 mm.

**(F)** Blastic Plasmacytoid Dendritic Cell Neoplasm (BPDCN). Flow cytometry of a representative BPDCN represents essentially 100% of cells are C45<sup>+</sup>CD56<sup>+</sup>CD123<sup>+</sup>.

**(G)** Adult T-cell Leukemia Lymphoma (ATLL; TL-69579). Left: Hematoxylin and Eosin (H&E; top) from representative spleen of P0 mouse after tail-vein injection showing characteristic morphology along with CD3<sup>+</sup>CD7<sup>-</sup> immunophenotype. Right: P0 cells were injected into tail-vein of P1 mice and disease developed in spleen, bone marrow and multiple extramedullary sites. H&E of a representative tumor from the dorsum of a mouse is shown. Scale bars represent 0.1 mm.

**(H)** Sézary Syndrome (TL-90501). Top panel: The patient skin biopsy showed a predominantly dermal infiltrate of intermediate-sized cells with convoluted nuclear contours, slightly dispersed chromatin, indistinct nucleoli and moderate amounts of cytoplasm. Immunophenotypic analysis revealed an infiltrate composed of CD4-positive T cells with loss of CD7. CD7 and CD8 highlighted background admixed small, reactive T cells. CD3 marked both the

reactive and neoplastic components. Bottom panel: Analysis of the P1 PDX revealed that the tumor cells homed not only to the spleen but also to the mouse skin, filling the dermal space, infiltrating the epidermis and forming multifocal Pautrier microabscesses. The PDX tumor cells showed an identical immunophenotype to the patient specimen. Scale bars describe the measurements indicated.

**(I)** Diffuse Large B-Cell Lymphoma. BL-86381 demonstrates CNS Tropism (BL-86381). Top Panel: The patient lymph node demonstrated a diffuse infiltrate of large-sized lymphoid cells with irregular nuclear contours, slightly dispersed chromatin, prominent central nucleoli and moderate amounts of pale cytoplasm. Immunophenotyping revealed that the tumor cells were positive for CD19 and CD10, consistent with a diffuse large B-cell lymphoma, germinal center B-cell-like. Additional 3 panels: These morphologic and immunophenotypic features were recapitulated in tumor infiltrates in P0, P1 and P2 PDX mice (immunophenotyping performed by IHC for P0 and P2 PDX mice, and by flow cytometry for P1 PDX mice). The tumor was present at the site of tumor implant in P0 and P1 PDX mice. The P2 PDX mice were generated from tail vein injection of banked cells, and demonstrated extensive CNS spread including involvement of the subpial/subarachnoid space with perivascular extension and superficial infiltration into brain parenchyma (lower right panel). This is a typical distribution pattern for lymphomatous involvement of the brain. Scale bars describe the measurements indicated.

**(J)** BL-18689 recapitulates bone marrow involvement. Left column: The patient's bone marrow was involved with a DLBCL in 5-10% of cells. After tail-vein injection into P0 mice, disease engrafted in the bone marrow and spleen. H&E and IHC for CD20 in a representative P1 mouse is shown. Scale bars represent indicated measurements.

**(K)** BL-75549 maintains tissue architecture after serial transplantation under the mouse renal capsule. A tumor seed from spleen involved by a patient's DLBCL was implanted under the renal capsule and expanded in P0 mice. A seed from this extrarenal tumor was then expanded in P1 mice. Representative H&E and IHC are shown. Scale bars represent indicated measurements.

**(L)** Extranodal marginal zone lymphoma (BL-72516) maintains morphology after serial transplantation under the mouse renal capsule. A patient's flank mass demonstrates effacement by small, PAX5<sup>+</sup> B-cells that were CD20<sup>+</sup>CD5<sup>-</sup>CD23<sup>-</sup> (not shown). Morphology is maintained after serial transplantation of tumor seeds under the renal capsule of P0 and P1 mice. Scale bars represent indicated measurements.

**(M)** Mantle cell lymphomas involving the blood readily engraft and metastasize to extramedullary sites. Left panel: BL-96069 was generated by tail-vein injection of peripheral blood from a patient with peripheral blood involvement by MCL and grew in bone marrow, peripheral blood and spleen. Right panel: Similarly, BL-98848 was generated by tail-vein injection of blood from a 2<sup>nd</sup> patient and involved bone marrow, blood, spleen and metastasized to liver. H&E and IHC are shown from representative mice. Scale bars represent indicated measurements. A third MCL model (BL-39435; see Movie S1, provided as a separate file) involved blood, bone marrow, lymph nodes, spleen, and gastrointestinal tract of P1 mice.

**Movie S1, refers to Table 1.** <sup>18</sup>F-FLT PET of a representative NSG mouse xenografted with BL-39435 obtained 23 days after transplantation. Disease is visible based on tracer uptake in multiple nodal regions, gastrointestinal tract, proximal femurs, sternum and spleen. Provided as a separate movie (.avi) file.

**Table S1, refers to Figure 1.** Gene list for targeted exon sequencing.

|               |               |               |               |               |                |                |                 |
|---------------|---------------|---------------|---------------|---------------|----------------|----------------|-----------------|
| <i>ABCA7</i>  | <i>CARD11</i> | <i>DDX3X</i>  | <i>ID3</i>    | <i>MKI67</i>  | <i>PIGA</i>    | <i>SETBP1</i>  | <i>TCF3</i>     |
| <i>ABL1</i>   | <i>CBL</i>    | <i>DIS3</i>   | <i>IDH1</i>   | <i>MLL3</i>   | <i>PIK3AP1</i> | <i>SETD2</i>   | <i>TCF4</i>     |
| <i>ALMS1</i>  | <i>CCND1</i>  | <i>DNMT3A</i> | <i>IDH2</i>   | <i>MLL2</i>   | <i>PIK3CA</i>  | <i>SF1</i>     | <i>TET2</i>     |
| <i>ALPK2</i>  | <i>CCND2</i>  | <i>EBF1</i>   | <i>IKZF1</i>  | <i>MLL3</i>   | <i>PIK3CD</i>  | <i>SF3A1</i>   | <i>TLR2</i>     |
| <i>APC</i>    | <i>CCND3</i>  | <i>EED</i>    | <i>IKZF2</i>  | <i>MUM1</i>   | <i>PIK3R1</i>  | <i>SF3B1</i>   | <i>TNFAIP3</i>  |
| <i>ARID1A</i> | <i>CD200</i>  | <i>EP300</i>  | <i>IKZF3</i>  | <i>MYC</i>    | <i>PIM1</i>    | <i>SGK1</i>    | <i>TNFRSF14</i> |
| <i>ARID1B</i> | <i>CD36</i>   | <i>EPHA6</i>  | <i>IL7R</i>   | <i>MYCN</i>   | <i>PLCG2</i>   | <i>SH2B3</i>   | <i>TNFSF9</i>   |
| <i>ARID2</i>  | <i>CD58</i>   | <i>EPHA7</i>  | <i>IRAK1</i>  | <i>MYD88</i>  | <i>POT1</i>    | <i>SMARCA2</i> | <i>TP53</i>     |
| <i>ARID3A</i> | <i>CD79A</i>  | <i>ETS1</i>   | <i>IRF4</i>   | <i>NF1</i>    | <i>PRDM1</i>   | <i>SMARCA4</i> | <i>TP63</i>     |
| <i>ASXL1</i>  | <i>CD79B</i>  | <i>ETV6</i>   | <i>IRF8</i>   | <i>NFKB2</i>  | <i>PRDM16</i>  | <i>SMARCB1</i> | <i>TP73</i>     |
| <i>ATM</i>    | <i>CDK4</i>   | <i>EZH2</i>   | <i>JAK1</i>   | <i>NFKBIA</i> | <i>PRKDC</i>   | <i>SMC1A</i>   | <i>TRAF2</i>    |
| <i>ATRX</i>   | <i>CDK6</i>   | <i>FAS</i>    | <i>JAK2</i>   | <i>NLRP5</i>  | <i>PRPF8</i>   | <i>SMC3</i>    | <i>TRAF3</i>    |
| <i>B2M</i>    | <i>CDKN2A</i> | <i>FBXO11</i> | <i>JAK3</i>   | <i>NOTCH1</i> | <i>PTEN</i>    | <i>SOCS1</i>   | <i>TRAF6</i>    |
| <i>BACH2</i>  | <i>CDKN2B</i> | <i>FBXW7</i>  | <i>KDM4C</i>  | <i>NOTCH2</i> | <i>PTPN11</i>  | <i>SRSF2</i>   | <i>TYK2</i>     |
| <i>BCL10</i>  | <i>CEBPA</i>  | <i>FLT3</i>   | <i>KDM6A</i>  | <i>NOTCH3</i> | <i>RAD21</i>   | <i>SRSF6</i>   | <i>U2AF1</i>    |
| <i>BCL11A</i> | <i>CELSR2</i> | <i>FOXO1</i>  | <i>KIT</i>    | <i>NPM1</i>   | <i>RAPGEF1</i> | <i>SRSF8</i>   | <i>U2AF2</i>    |
| <i>BCL11B</i> | <i>CHD2</i>   | <i>GATA1</i>  | <i>KLHL6</i>  | <i>NR3C1</i>  | <i>RB1</i>     | <i>STAG2</i>   | <i>UBR5</i>     |
| <i>BCL2</i>   | <i>CIITA</i>  | <i>GATA2</i>  | <i>KRAS</i>   | <i>NRAS</i>   | <i>REL</i>     | <i>STAT1</i>   | <i>ULK4</i>     |
| <i>BCL6</i>   | <i>CNOT3</i>  | <i>GATA3</i>  | <i>LEF1</i>   | <i>NT5C2</i>  | <i>RELN</i>    | <i>STAT3</i>   | <i>VPS13A</i>   |
| <i>BCL7A</i>  | <i>CREBBP</i> | <i>GNA11</i>  | <i>LMO2</i>   | <i>P2RY8</i>  | <i>RFTN1</i>   | <i>STAT5A</i>  | <i>WT1</i>      |
| <i>BCR</i>    | <i>CRLF2</i>  | <i>GNA13</i>  | <i>LUC7L2</i> | <i>PAX5</i>   | <i>RHOA</i>    | <i>STAT5B</i>  | <i>XPO1</i>     |
| <i>BLNK</i>   | <i>CSF1R</i>  | <i>GNAQ</i>   | <i>MALT1</i>  | <i>PCLO</i>   | <i>RNF213</i>  | <i>STAT6</i>   | <i>ZFHX3</i>    |
| <i>BRAF</i>   | <i>CSF3R</i>  | <i>GNAS</i>   | <i>MDM2</i>   | <i>PDGFC</i>  | <i>RPL10</i>   | <i>SUZ12</i>   | <i>ZRSR2</i>    |
| <i>BTG1</i>   | <i>CTCF</i>   | <i>GNB1</i>   | <i>MDM4</i>   | <i>PDGFRA</i> | <i>RPL5</i>    | <i>SYK</i>     |                 |
| <i>BTG2</i>   | <i>CTSS</i>   | <i>GNB2</i>   | <i>MEF2B</i>  | <i>PDGFRB</i> | <i>RUNX1</i>   | <i>TAL1</i>    |                 |
| <i>BTK</i>    | <i>CXCR4</i>  | <i>HCK</i>    | <i>MEF2C</i>  | <i>PHF6</i>   | <i>SENP6</i>   | <i>TBL1XR1</i> |                 |

205 genes that were sequenced using an established next-generation sequencing platform (Odejide et al Blood 2014) in PDXs

**Table S2, refers to Figure 1.** Mutation calls from 205 genes sequenced in 107 PDXs. Provided as separate excel file.

A

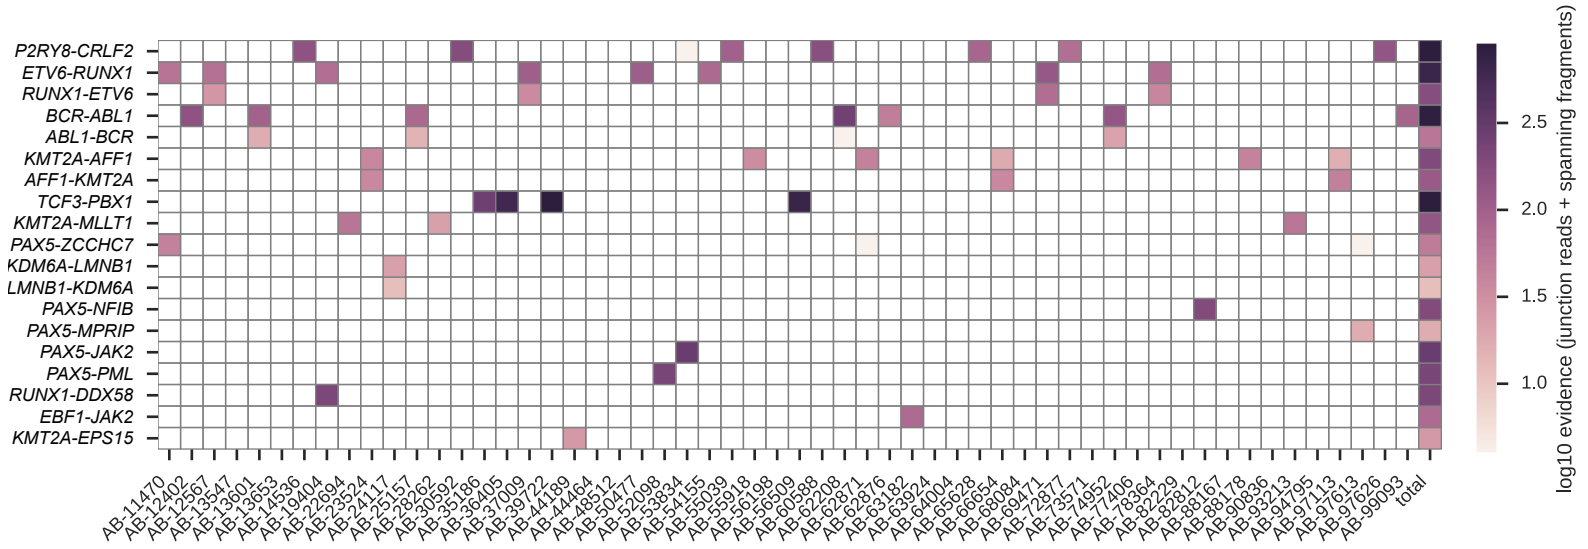

B

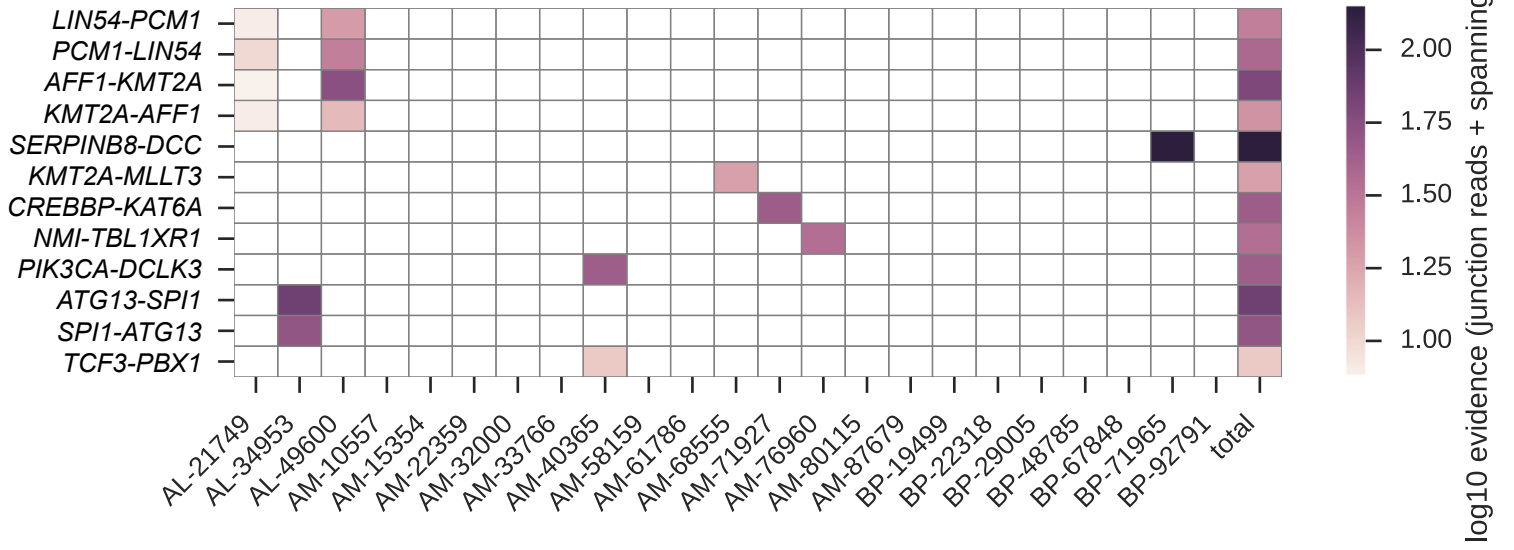

C

a

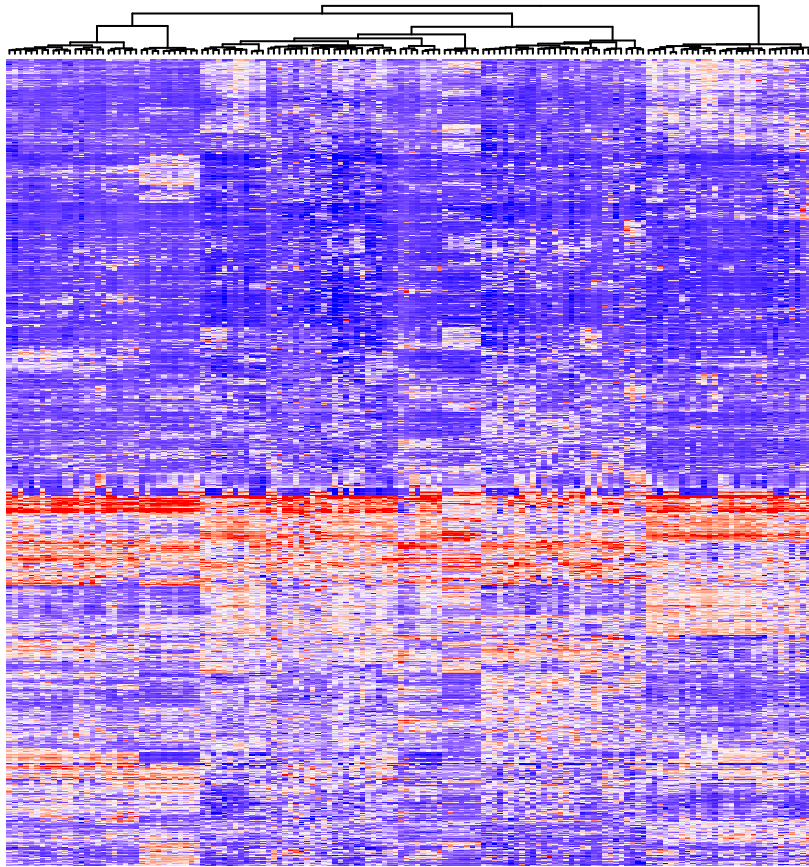

Legend

RNA Expression z-score

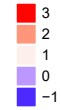

Sample Cohort

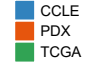

Disease WHO-classification

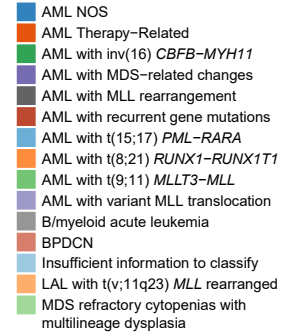

Disease Phase of Treatment

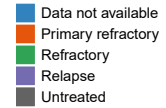

Patient Gender

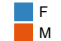

Patient Age (Years)

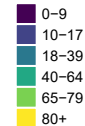

AML Cytogenetic Risk Category

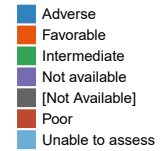

AML FAB Classification

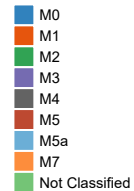

PDX Mutations

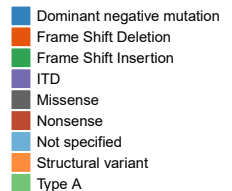

b

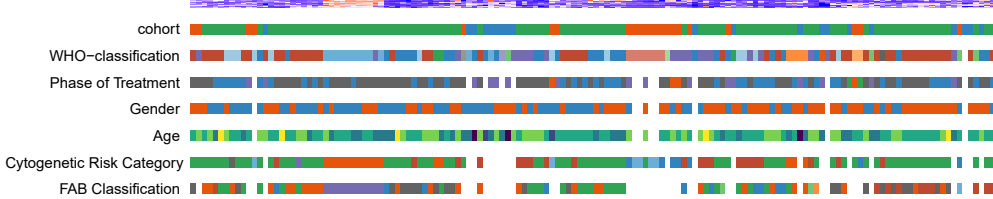

c

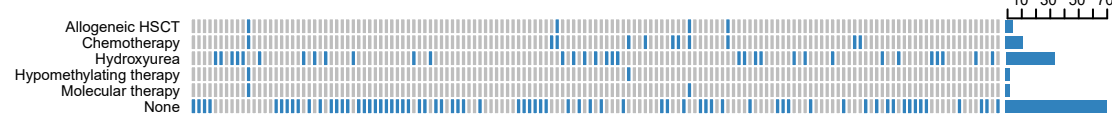

d

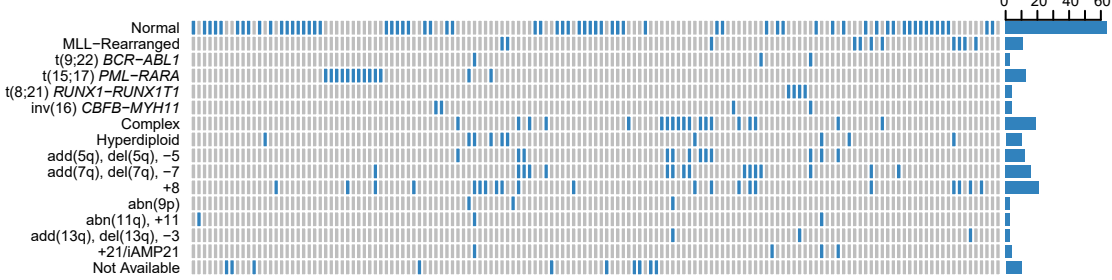

e

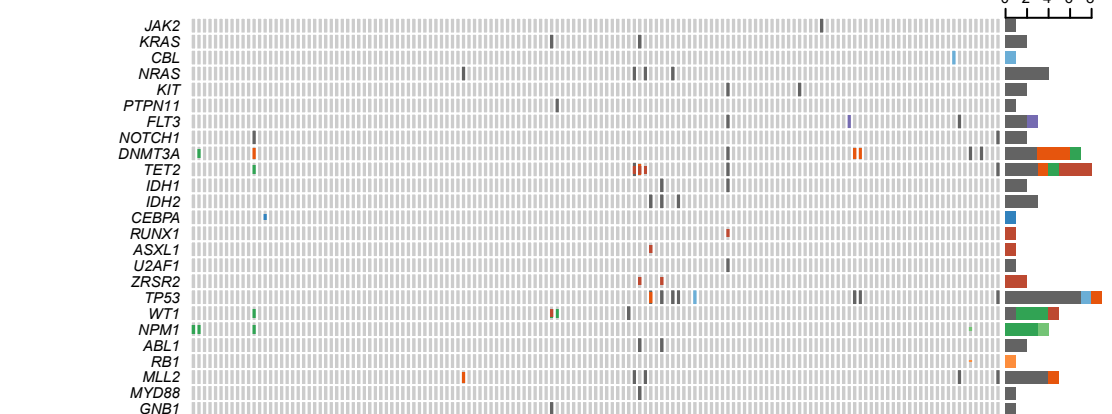

D

a

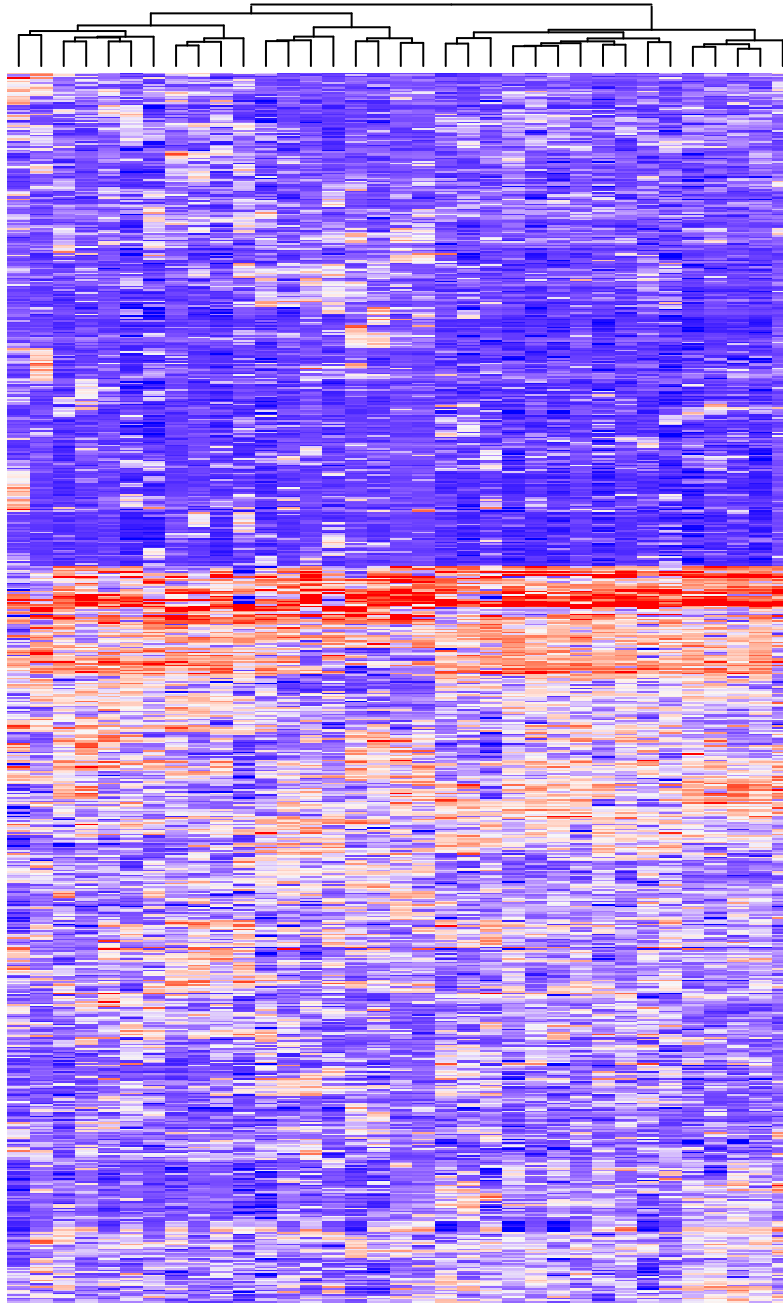

Legend

RNA Expression z-score

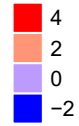

Sample Cohort

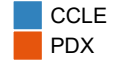

Disease WHO-classification

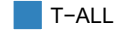

Disease Phase of Treatment

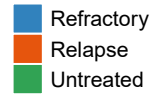

Patient Gender

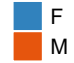

Patient Age (Years)

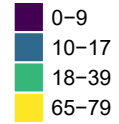

PDX Mutations

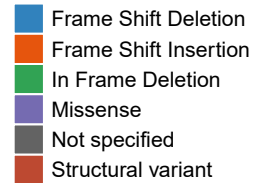

b

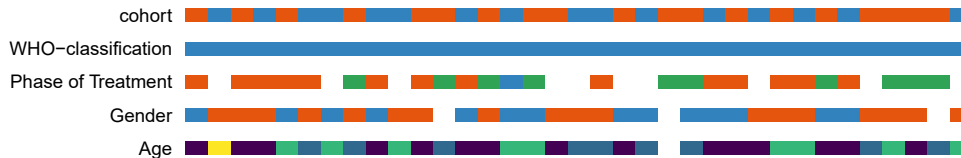

c

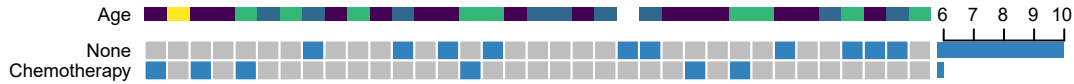

d

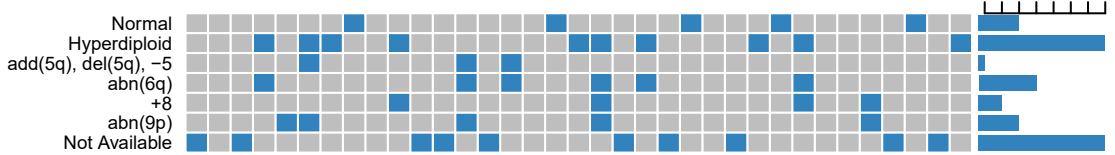

e

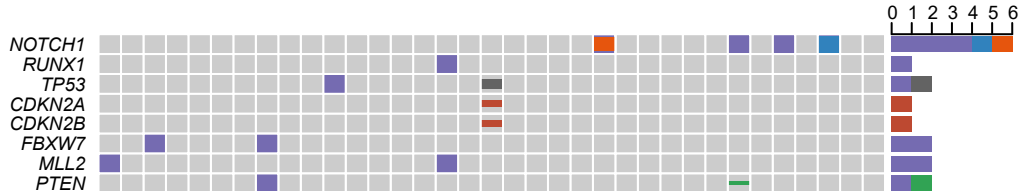



E

a

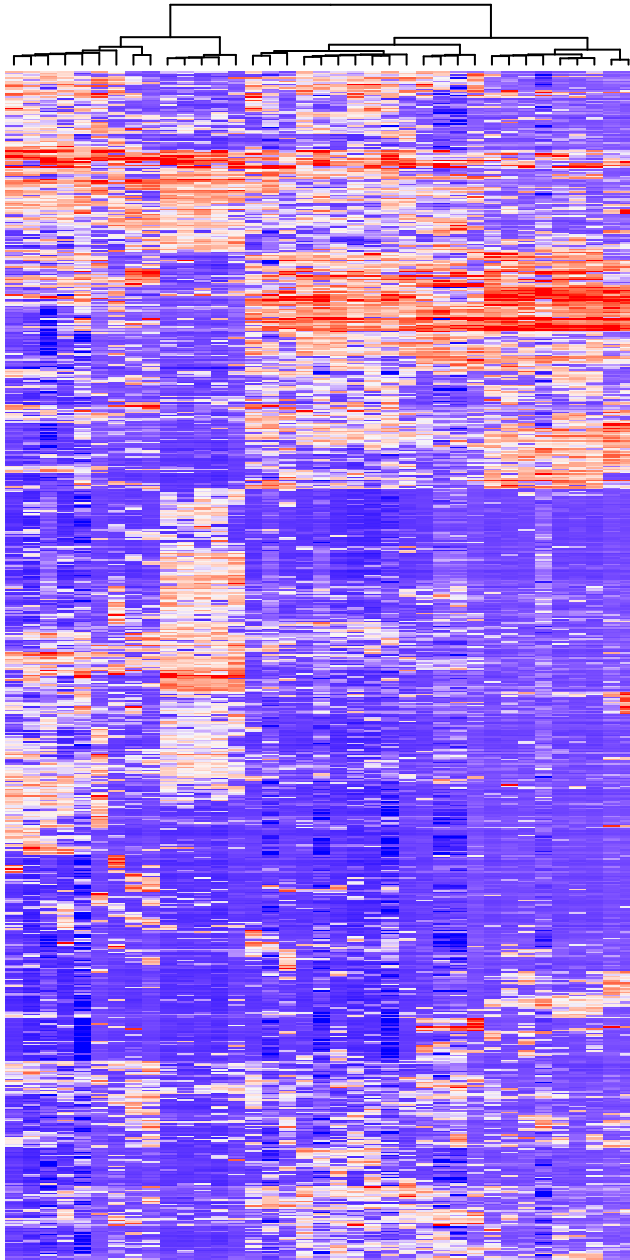

## Legend

## RNA Expression z-score

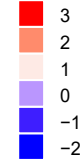

## Sample Cohort

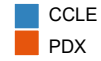

## Disease WHO-classification

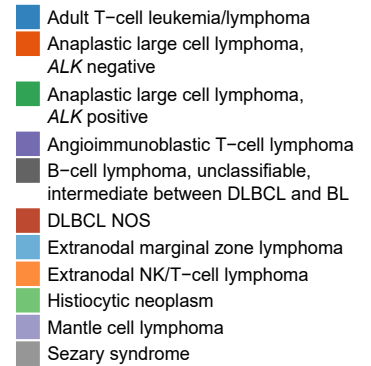

## Disease Phase of Treatment

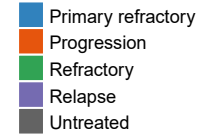

## Patient Gender

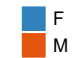

## Patient Age (Years)

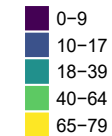

## PDX Mutations

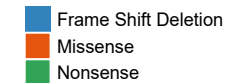

b

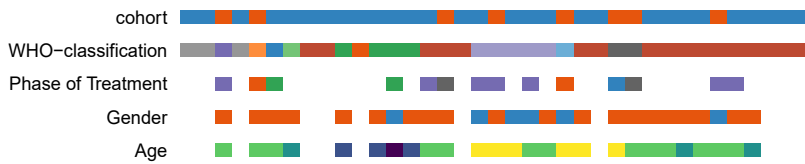

c

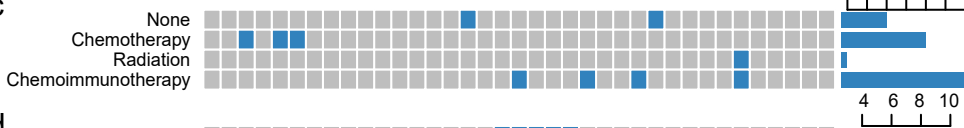

d

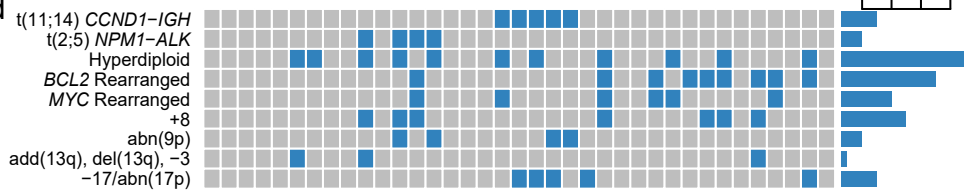

e

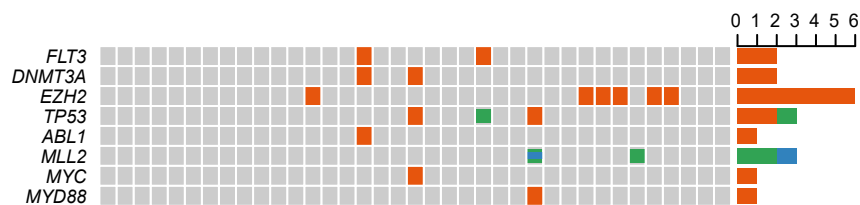

**Figure S2, refers to Figure 1.**

**(A)** Gene fusions identified in B-ALL PDX models based on transcriptome sequencing. Candidate fusions were called from RNA-Seq data using the STAR-Fusion 0.4.0 algorithm (<https://star-fusion.github.io>) and quantitatively evaluated by summing spanning fragments and junction reads. Those with sums of  $\geq 10$  over all samples were retained and manually filtered to remove likely homology-induced artifacts. Fusions detected in B-ALL PDX models are depicted here in heatmap form, with color coding for strength of evidence supporting fusion calls. Both canonical and reciprocal fusions (e.g., *BCR-ABL1* and *ABL1-BCR*) are shown, when detected. PDX samples are ordered alphanumerically to facilitate sample identification.

**(B)** Gene fusions identified in AML PDX models based on transcriptome sequencing. Candidate fusions were called from RNA-Seq data and filtered as described. Fusions detected in AML PDX models are depicted here in heatmap form, with color coding for strength of evidence supporting fusion calls. Both canonical and reciprocal fusions (e.g., *KMT2A-AFF1* and *AFF1-KMT2A*) are shown, when detected. PDX samples are ordered alphanumerically.

**(C)** Integrative analysis of AML PDX models, primary samples, and cell lines. (a) Unsupervised hierarchical clustering of RNA expression profiles among 20 AML PDX models (PDX cohort), 104 external primary AML samples (TCGA cohort), and 20 AML cell lines (CCLE cohort), using the same methods as for figure 1. (b) Key clinical characteristics of patients from whose tumors PDX models (PDX cohort) or cell lines (CCLE cohort) were derived, or whose tumors were sequenced directly (TCGA cohort), including specific diagnosis (by WHO 2008 classification), phase of treatment (as previously defined in Figure 1 legend), patient gender, patient age when the referenced tumor specimen was obtained, FAB classification (for historical reference), and cytogenetic risk category (using criteria of (Grimwade et al., 2010)). (c) Binary matrix of prior therapies to which patient was exposed prior to sampling of the referenced tumor, if known. (d) Selected cytogenetic features of patient tumors from which PDX models (PDX cohort) or cell lines (CCLE cohort) were derived, or of the tumors themselves (TCGA cohort). Shown are cytogenetic features or groups of related features reported in at least three samples within this data set. (e) OncoPrint of selected mutations detected in PDX models by targeted exon sequencing, reported in cell lines by ATCC or DSMZ or reported in primary samples within the clinical annotation available from TCGA. Overall, AML clustering tended to reflect cytogenetic changes, with t(15;17) M3 AMLs forming a distinct clade, as with pediatric t(8;21) M1/M2 AMLs and AMLs with MDS-related cytogenetic changes. Of note, our repository includes nine blastic plasmacytoid dendritic cell neoplasms (BPDCN), of which seven underwent whole transcriptome sequencing; these, too, formed a tight cluster.

**(D)** Integrative analysis T-ALL PDX models and cell lines. (a) Unsupervised hierarchical clustering of RNA expression profiles among 19 T-ALL PDX models (PDX cohort) and 16 T-ALL cell lines (CCLE cohort), using the same methods as for figure 1. (b) Key clinical characteristics of patients from whose tumors PDX models (PDX cohort) or cell lines (CCLE cohort) were derived, including specific diagnosis (by WHO 2008 classification), phase of treatment (as previously defined in Figure 1 legend), patient gender, and patient age when the referenced tumor specimen was obtained. (c) Binary matrix of prior therapies to which patient was exposed prior to sampling of the referenced tumor, if known. (d) Selected cytogenetic features of patient tumors from which PDX models (PDX cohort) or cell lines (CCLE cohort) were derived. Shown are cytogenetic features or groups of related features reported in at least three samples within this data set. (e) OncoPrint of selected mutations detected in PDX models by targeted exon sequencing or reported in cell lines by ATCC or DSMZ. Overall, T-ALLs comprised two primary clusters, one enriched in samples with isolated *NOTCH1* mutations, and the other with mutations in various other genes, including *FBXW7*.

**(E)** Integrative analysis of non-Hodgkin lymphoma PDX models and cell lines. (a) Unsupervised hierarchical clustering of RNA expression profiles among 8 non-Hodgkin lymphoma PDX models (PDX cohort) and 29 non-Hodgkin lymphoma cell lines (CCLE cohort), using the same methods as for figure 1. (b) Key clinical characteristics of patients from whose tumors PDX models (PDX cohort) or cell lines (CCLE cohort) were derived, including specific diagnosis (by WHO 2008 classification), phase of treatment (as previously defined in Figure 1 legend), patient gender, and patient age when the referenced tumor specimen was obtained. (c) Binary matrix of prior therapies to which patient was exposed prior to sampling of the referenced tumor, if known. (d) Selected cytogenetic features of patient tumors from which PDX models (PDX cohort) or cell lines (CCLE cohort) were derived. Shown are cytogenetic features or groups of related features reported in at least three samples within this data set. (e) OncoPrint of selected mutations detected in PDX models by targeted exon sequencing or reported in cell lines by ATCC or DSMZ.

**Table S3, refers to Figure 1.** PDXs arranged in the same order as on the Y axis of the transcriptional heatmap and genes arranged in the same order as the X axis of the transcriptional heatmap for all PDXs in Figure 1. Provided as separate excel file.

**Table S4, refers to Figure 2.** PDXs arranged in the same order as on the Y axis of the transcriptional heatmap and gene arranged in the same order as the X axis of the transcriptional heatmap for B-ALL samples (PDXs, cell lines and primary samples). Provided as separate excel file.

A

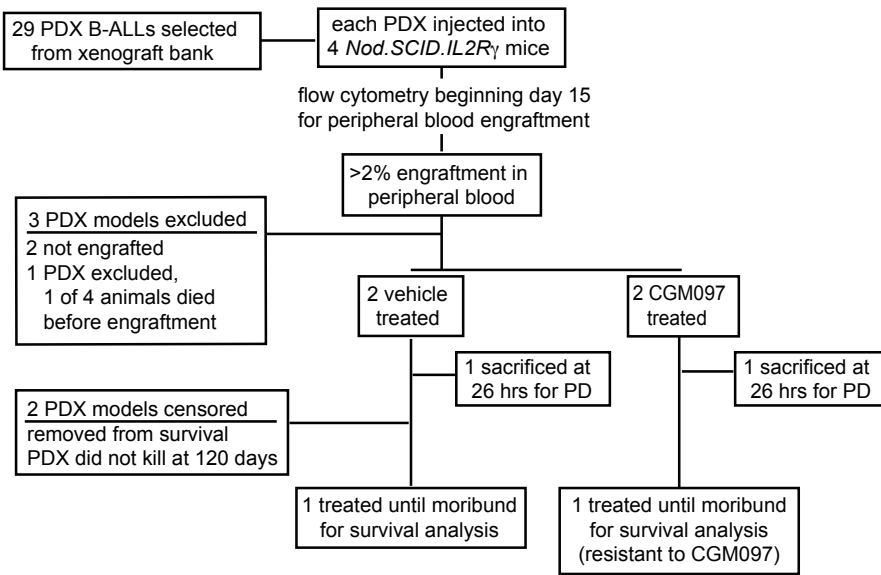

B

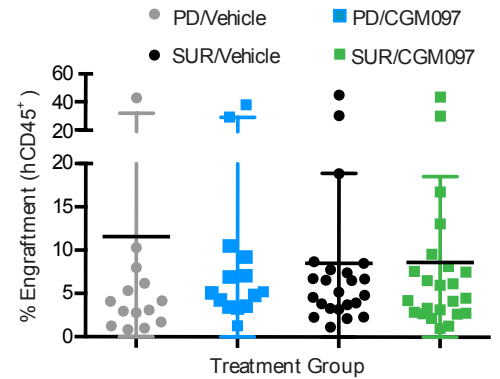

C

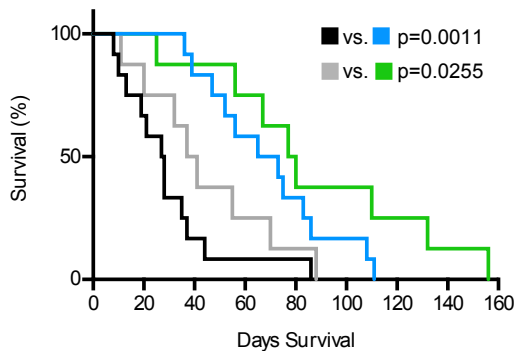

|   | Patient Sex | Treatment | n  | Median Surv . |
|---|-------------|-----------|----|---------------|
| ■ | female      | vehicle   | 12 | 27.5          |
| ■ | female      | CGM097    | 12 | 69            |
| ■ | male        | vehicle   | 8  | 39            |
| ■ | male        | CGM097    | 8  | 78.5          |

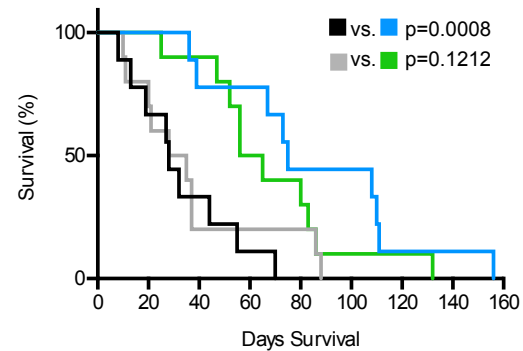

|   | Patient Age     | Treatment | n  | Median Surv . |
|---|-----------------|-----------|----|---------------|
| ■ | pediatric (<18) | vehicle   | 9  | 28            |
| ■ | pediatric (<18) | CGM097    | 9  | 75            |
| ■ | adult (>=18)    | vehicle   | 10 | 31.5          |
| ■ | adult (>=18)    | CGM097    | 10 | 60.5          |

**Figure S3, refers to Figure 3.**

**(A)** Study design of CGM097 survival study. 29 B-ALL PDXs were engrafted into 4 *Nod. SCID.IL2R $\gamma$*  mice. After engraftment, animals were randomized to vehicle and treatment cohorts. 5 PDX models were excluded from the final data set for failure to meet previously established study criteria. Animals were dosed daily by oral gavage with 100mg/kg CGM097 or methycellulose vehicle.

**(B)** Xenograft engraftment characteristics for CGM097 survival study. Peripheral blood engraftment after red blood cell lysis of animals for each treatment cohort as determined by flow cytometry for human CD19 and human CD45.

**(C)** Kaplan-Meier survival analysis of *TP53* wild-type PDX models derived from female patients or male patients (left) and pediatric patients versus adult patients (right). Comparison was performed using the log-rank test.

Error bars represent the standard error of the mean (S.E.M.).

**Table S5, refers to Figure 4.** List of genes in the Nanostring ETP53 Panel.

|               |                 |                 |                     |
|---------------|-----------------|-----------------|---------------------|
| <i>ABCB1</i>  | <i>CHEK2</i>    | <i>IGFBP4</i>   | <i>SESN1</i>        |
| <i>ACTA2</i>  | <i>COL18A1</i>  | <i>ITSN1</i>    | <i>SESN2</i>        |
| <i>AEN</i>    | <i>CPB2</i>     | <i>KAT2B</i>    | <i>SESN3</i>        |
| <i>AKT1S1</i> | <i>CRY1</i>     | <i>LRDD</i>     | <i>SFN</i>          |
| <i>APAF1</i>  | <i>CSNK1A1</i>  | <i>MAPK8</i>    | <i>SHISA5</i>       |
| <i>ATF3</i>   | <i>CSNK1D</i>   | <i>MCL1</i>     | <i>SIAH1</i>        |
| <i>ATM</i>    | <i>DDB2</i>     | <i>MDM2</i>     | <i>SIAH2</i>        |
| <i>ATR</i>    | <i>E2F1</i>     | <i>MDM4</i>     | <i>SIAH3</i>        |
| <i>BAI1</i>   | <i>E2F3</i>     | <i>MRAS</i>     | <i>SIRT1</i>        |
| <i>BAX</i>    | <i>FAS</i>      | <i>NFKBIB</i>   | <i>ST13</i>         |
| <i>BBC3</i>   | <i>FDXR</i>     | <i>NQO1</i>     | <i>STEAP3</i>       |
| <i>BCL2</i>   | <i>FHL2</i>     | <i>PCNA</i>     | <i>THBS1</i>        |
| <i>BCL6</i>   | <i>GADD45A</i>  | <i>PERP</i>     | <i>TIMP3</i>        |
| <i>BID</i>    | <i>GAK</i>      | <i>PIGS</i>     | <i>TNFRSF10B</i>    |
| <i>BRCA1</i>  | <i>GAL3ST3</i>  | <i>PLK3</i>     | <i>TP53</i>         |
| <i>BTG2</i>   | <i>GDF15</i>    | <i>PMAIP1</i>   | <i>TP63</i>         |
| <i>CASP2</i>  | <i>GTSE1</i>    | <i>PPM1D</i>    | <i>TP73</i>         |
| <i>CASP3</i>  | <i>HDAC1</i>    | <i>PRKAB1</i>   | <i>TSC2</i>         |
| <i>CASP8</i>  | <i>HIC1</i>     | <i>PTEN</i>     | <i>UQCRFS1</i>      |
| <i>CASP9</i>  | <i>HIF1A</i>    | <i>PTK2</i>     | <i>VCAN</i>         |
| <i>CCND1</i>  | <i>HRAS</i>     | <i>RB1</i>      | <i>XPC</i>          |
| <i>CCNE1</i>  | <i>HSF1</i>     | <i>RCHY1</i>    | <i>ZMAT3</i>        |
| <i>CCNG1</i>  | <i>HSP90AA1</i> | <i>RDBP</i>     | <b><i>CLTC</i></b>  |
| <i>CDK1</i>   | <i>HSPA1A</i>   | <i>RFWD2</i>    | <b><i>GAPDH</i></b> |
| <i>CDK2</i>   | <i>HSPA1B</i>   | <i>RPRM</i>     | <b><i>GUSB</i></b>  |
| <i>CDK4</i>   | <i>HSPA4L</i>   | <i>RPS27L</i>   | <b><i>HPRT1</i></b> |
| <i>CDK6</i>   | <i>HSPA8</i>    | <i>RRM2B</i>    | <b><i>PGK1</i></b>  |
| <i>CDKN1A</i> | <i>IER3</i>     | <i>SERPINB2</i> | <b><i>TUBB</i></b>  |
| <i>CDKN2A</i> | <i>IGFBP1</i>   | <i>SERPINB5</i> | <i>mGapdh</i>       |
| <i>CHEK1</i>  | <i>IGFBP3</i>   | <i>SERPINE1</i> | <i>mPgk1</i>        |

Housekeeping genes for normalization are indicated in **bold**. Murine *Gapdh* and *Pgk1* are included to measure contamination by murine cells.

**Table S6, refers to Figure 4.** Differentially expressed genes in *TP53* wild-type PD samples

| <u>Gene</u>      | <u>Mean Vehicle</u> | <u>Mean CGM097</u> | <u>Fold Change</u> | <u>p value</u> | <u>FDR</u> |
|------------------|---------------------|--------------------|--------------------|----------------|------------|
| <i>BBC3</i>      | 134                 | 694                | 5.18               | 1.31E-11       | 4.46E-10   |
| <i>TNFRSF10B</i> | 234                 | 790                | 3.37               | 3.08E-06       | 5.24E-05   |
| <i>ZMAT3</i>     | 734                 | 2617               | 3.56               | 8.77E-06       | 9.94E-05   |
| <i>FAS</i>       | 69                  | 225                | 3.27               | 6.57E-05       | 4.93E-04   |
| <i>CDKN1A</i>    | 2838                | 7823               | 2.76               | 7.25E-05       | 4.93E-04   |
| <i>MDM2</i>      | 9527                | 20079              | 2.11               | 3.56E-04       | 2.02E-03   |
| <i>FDXR</i>      | 58                  | 138                | 2.37               | 5.18E-04       | 2.52E-03   |
| <i>LRDD</i>      | 274                 | 367                | 1.34               | 1.09E-02       | 4.63E-02   |
| <i>SESN2</i>     | 59                  | 118                | 2.01               | 1.31E-02       | 4.95E-02   |
| <i>AEN</i>       | 101                 | 200                | 1.98               | 1.95E-02       | 6.63E-02   |
| <i>DDB2</i>      | 331                 | 584                | 1.77               | 2.31E-02       | 7.14E-02   |
| <i>SESN1</i>     | 145                 | 291                | 2.01               | 2.57E-02       | 7.17E-02   |
| <i>BAX</i>       | 1399                | 2643               | 1.89               | 2.74E-02       | 7.17E-02   |
| <i>GAL3ST3</i>   | 4                   | 3                  | 0.61               | 3.21E-02       | 7.34E-02   |
| <i>CDK1</i>      | 5127                | 2984               | 0.58               | 3.24E-02       | 7.34E-02   |
| <i>XPC</i>       | 334                 | 586                | 1.76               | 4.70E-02       | 9.99E-02   |

PDX models were treated for 26 hrs with CGM097 versus vehicle. Differentially expressed genes were identified using DESeq, genes that had an unadjusted p value <0.05 are shown. Genes with FDR <0.05 are in blue.

**Table S7, refers to Figure 4.** Differentially expressed genes in CGM097-treated samples at early treatment and after disease progression.

| <u>Gene</u>      | <u>Mean PD</u> | <u>Mean SUR</u> | <u>Fold Change</u> | <u>p value</u> | <u>FDR</u> |
|------------------|----------------|-----------------|--------------------|----------------|------------|
| <i>TNFRSF10B</i> | 940            | 376             | 0.4                | 0.00247        | 0.00846    |
| <i>BBC3</i>      | 805            | 311             | 0.39               | 0.00282        | 0.00846    |
| <i>FAS</i>       | 269            | 104             | 0.39               | 0.00749        | 0.01498    |
| <i>FDXR</i>      | 164            | 76              | 0.46               | 0.02929        | 0.04265    |
| <i>MDM2</i>      | 22999          | 13251           | 0.58               | 0.03638        | 0.04265    |
| <i>CDKN1A</i>    | 9060           | 4527            | 0.5                | 0.04265        | 0.04265    |

Differentially expressed genes in CGM097-treated *TP53* wild-type PDX models at 26 hrs (PD) versus moribund (SUR) timepoints. Differentially expressed genes were identified using DESeq, genes that had a p value <0.05 are shown and all had FDR < 0.05.

A

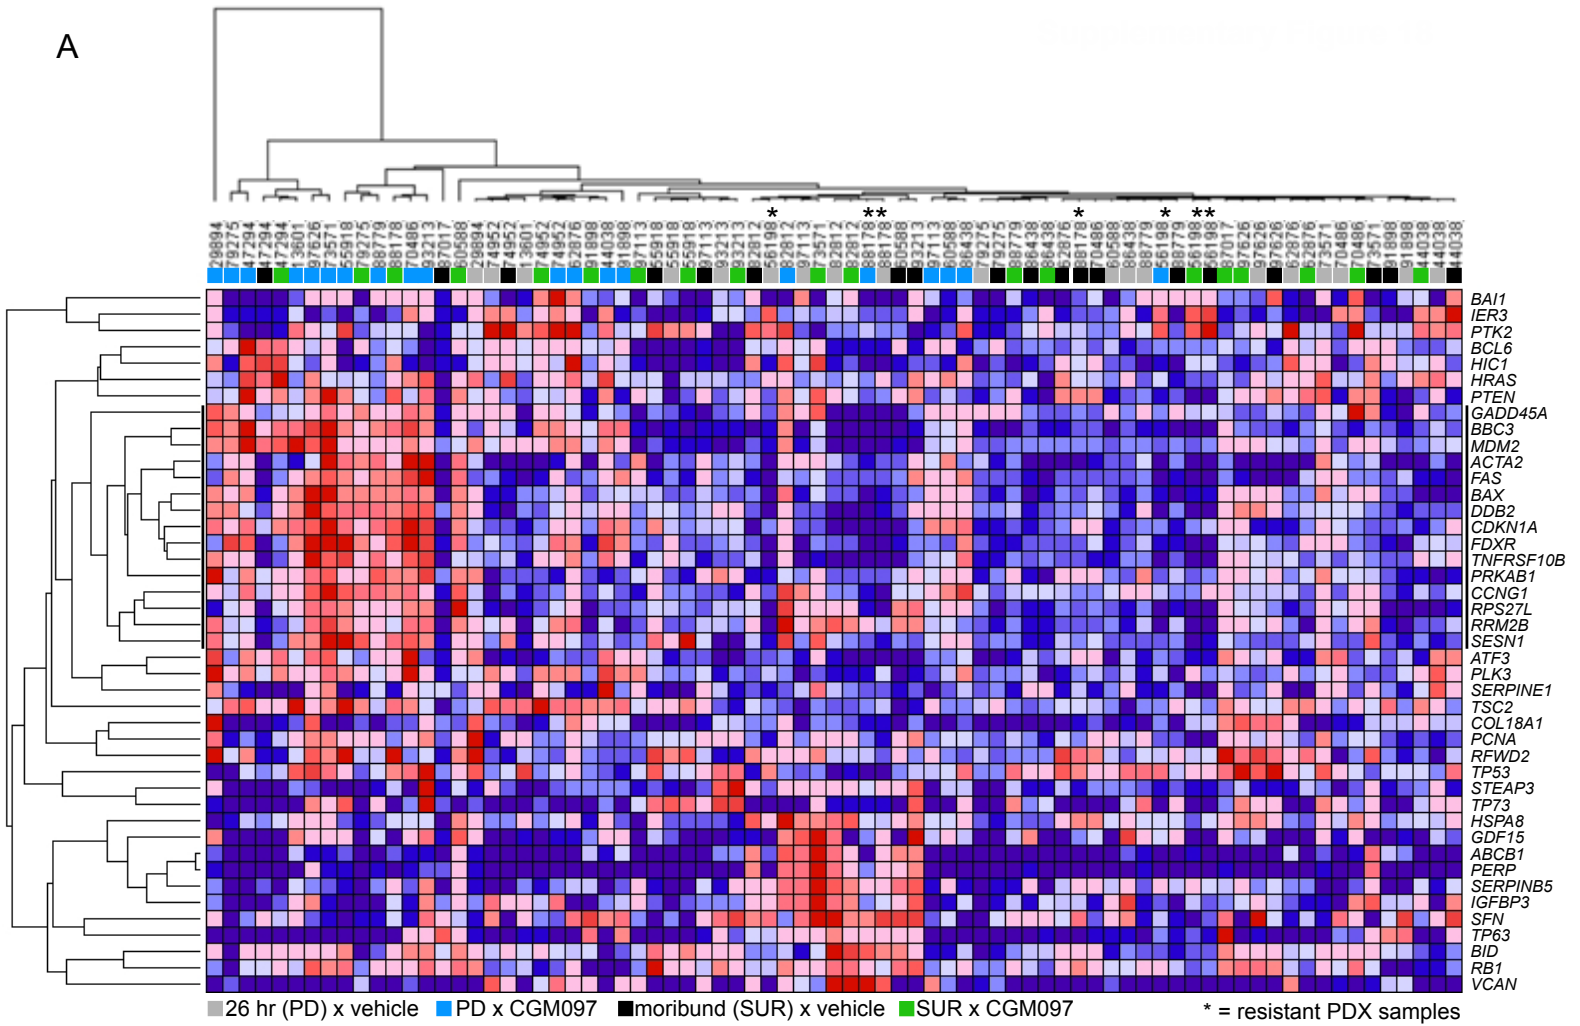

B

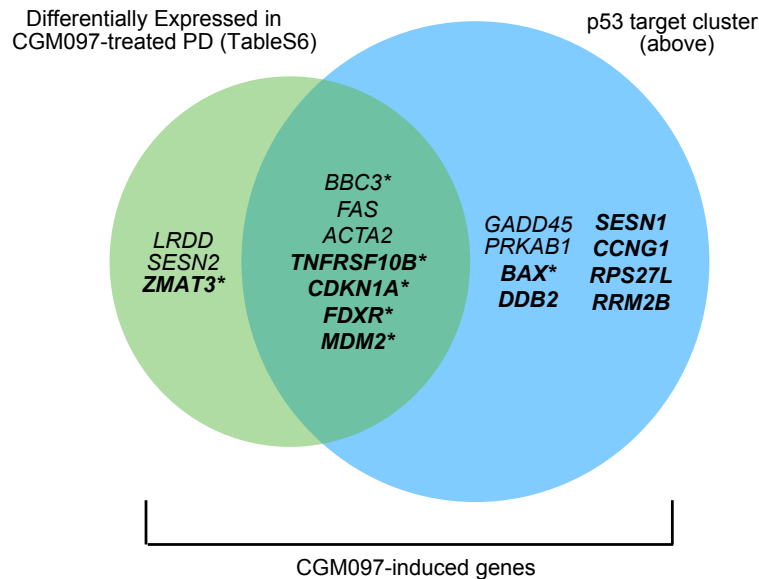

**Bold** = 13 Gene Signature genes (Jeay et al. eLife 2015) \* = upregulated in RG7112-treated patients (Andreef et al Clin. Canc. Res 2015)

**Figure S4, refers to Figure 4.**

**(A)** Heatmap of genes on the NanoString set and samples obtained from mice treated with vehicle or CGM097 at both the PD (26 hours) and SUR (moribund timepoints).

**(B)** Venn diagram overlaying genes differentially expressed in CGM097-treated PDXs at the PD timepoint (green), as determined by DESeq (Table S6) and genes within the p53 target cluster (identified as a cluster in red in the upper left of the heatmap above). Genes in bold were among the 13 identified within the response signature of cell lines to CGM097 by Jeay et al. eLife 2015. Those with \* were among the genes identified as modulated by RG7112 in patient samples by Andreeff et al. Clin Cancer Res 2015.

## **Supplemental Experimental Procedures**

### **CGM097 Study**

Viably frozen B-ALL xenograft cells were thawed and changed into 1X PBS before tail-vein injection at  $0.5\text{--}2.0 \times 10^6$  per mouse. Engraftment was monitored every 7 days, starting 3 weeks post-injection, by flow cytometry of 50  $\mu\text{l}$  of peripheral blood. Blood was processed with Red Blood Cell Lysis Buffer (Qiagen) before staining with antibodies against human CD45 (APC-conjugated, eBioscience 17-0459-42) and human CD19 (PE-conjugated eBioscience 12-0193-82) in 1XPBS with 2mM EDTA to assess engraftment. Flow cytometry data was analyzed with FlowJo. When engraftment was determined to be  $\geq 2\%$  of the live cell population, the remaining two animals with the same PDX were bled for analysis before starting treatment. Animals were dosed daily with 100 mg/kg CGM097 or methylcellulose vehicle by oral gavage.

### **Pharmacodynamic assessment**

26 hours after the start of treatment (2 hours after receiving the second drug dose), animals were euthanized according to standard IACUC approved protocols. Spleens were removed and a section was fixed in 10% paraformaldehyde for immunohistochemistry along with one femur. The remaining splenocytes were mechanically disrupted, red blood cell lysed and depleted of mouse cells by magnetic bead sorting. Cells were divided into  $1\text{--}5 \times 10^6$ /cell aliquots and snap frozen for further analysis.

### **Statistical Methods**

Data were collected using the nCounter Digital Analyzer. Raw NanoString counts were normalized in NSolver using positive control probe sets followed by a biological normalization with six housekeeping genes and subtraction of negative controls for background noise see Table S5 for gene list. Normalization diagnostics were also examined using the NanoStringNorm package in R. Unsupervised clustering analysis was performed using Pearson correlation with average link clustering. Differential expression between experimental criteria was determined using raw counts and normalization procedures within the DEseq package in R based on a negative binomial distribution. The false discovery rate (FDR – Benjamini and Hochberg) method was used to adjust for multiple comparisons after filtering for those in which at least a 1.2 fold change was observed. Both unsupervised and supervised clustering were performed using GenePattern (Broad Institute).



## RNASeq

Analysis of RNASeq data was implemented as a Snakemake (Koster and Rahmann, 2012) workflow. The complete workflow documenting all utilized parameters and tools so as to permit reproducibility is available at <https://bitbucket.org/cfce/weinstock-leukemia>. Paired end RNASeq samples were mapped to the human genome reference assembly (hg19) with STAR 2.4.2a (Dobin et al., 2013). Transcript expressions were estimated with Cufflinks 2.2.1 without transcript assembly (Trapnell et al., 2010). Gene expressions were calculated as sums of transcript FPKM values. Genes with transcripts smaller than 300bp were ignored. In order to compare the obtained FPKM values with external datasets, namely RNASeq RPKMs from the TCGA AML cohort, RMA-normalized log2 scaled microarray intensities from CCLE cohort and RNASeq RPKMs from NCBI Sequence Read Archive (SRA) study SRP058414 (primary human pre-B ALL whole transcriptome sequencing, <http://www.ncbi.nlm.nih.gov/Traces/study/?acc=SRP058414>). All expression values were log2 transformed.

Pre-normalized gene expressions follow similar bimodal distributions in all data sets. A quantile normalization (Limma 3.26.1 (Ritchie et al., 2015)) was therefore performed to adjust for library depth and technology specific differences, as shown below. Distribution of gene expressions in log2 scale derived from multiple data sets (CCLE

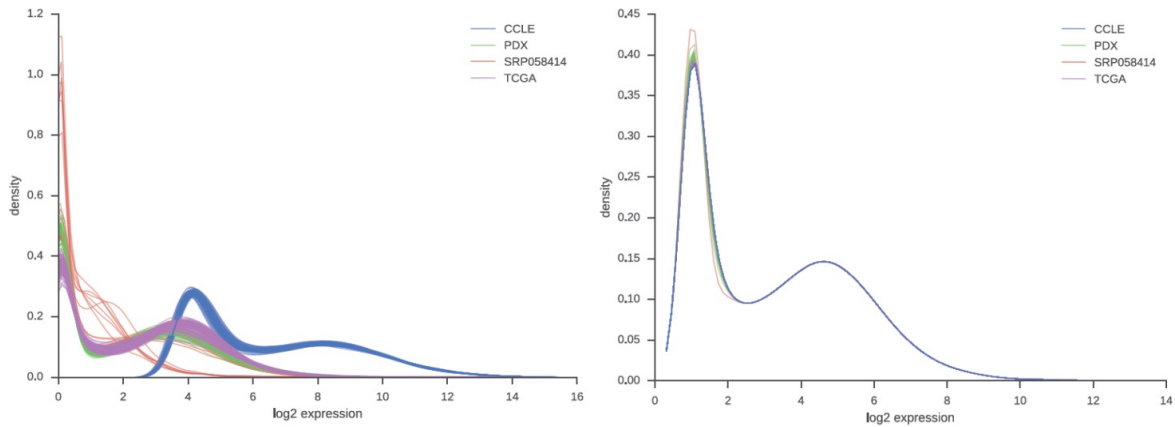

cell lines, PDX models, SRP058414 primary pre-B ALL samples, and TCGA primary AML samples). Data are shown before (left panel) and after (right panel) quantile normalization. The primary sources of variation after quantile normalization were the different batches (see below).

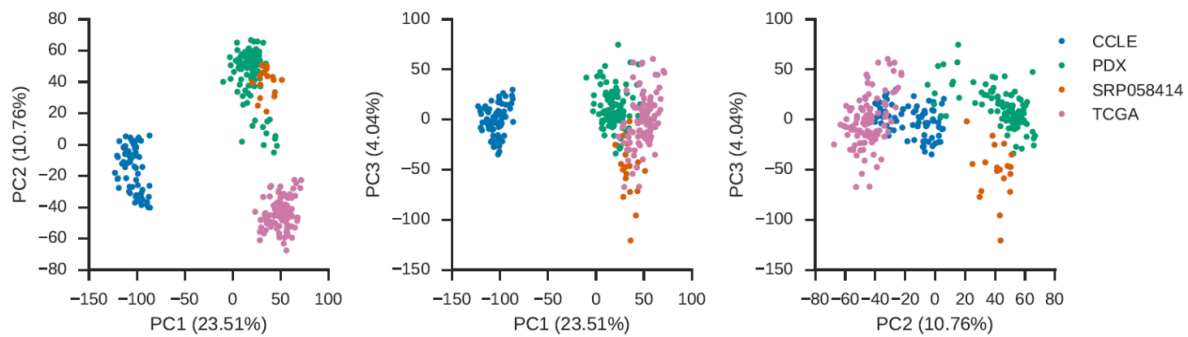

For the histology specific analysis, we successfully removed batch effects within each tumor type using the ComBat approach from SVA 3.18.0 (<http://doi.org/10.1038/nbt.1621>) without specifying additional covariates. Shown above is the principle components analysis of quantile-normalized gene expression from multiple data sets (CCLE, PDX, SRP058414, and TCGA). The factor explaining the greatest amount of variation in the data as plotted against the top eigenvectors is the source of data (i.e., batch effects).

**A**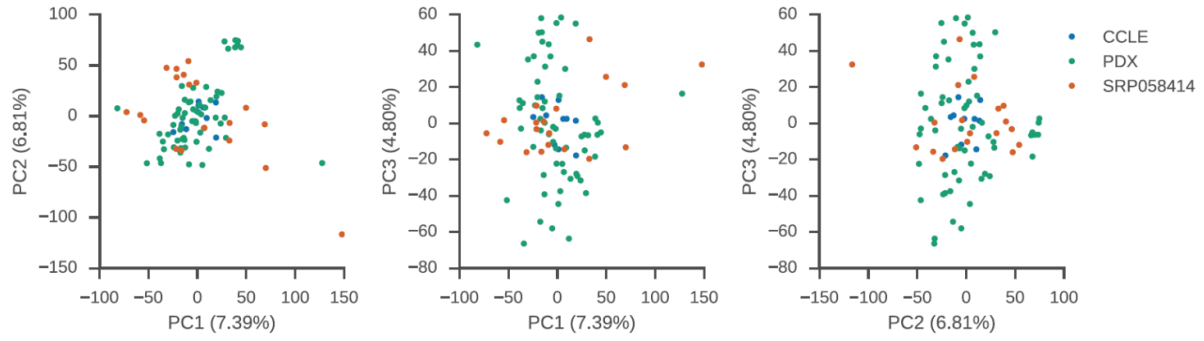**B**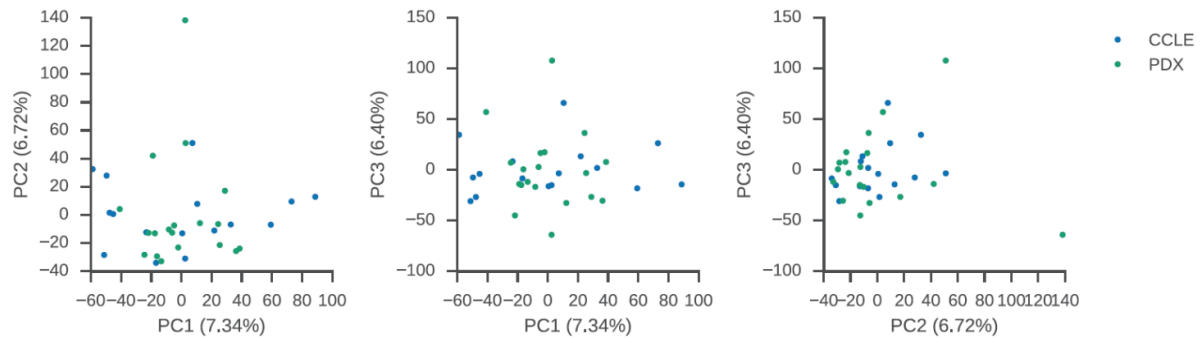**C**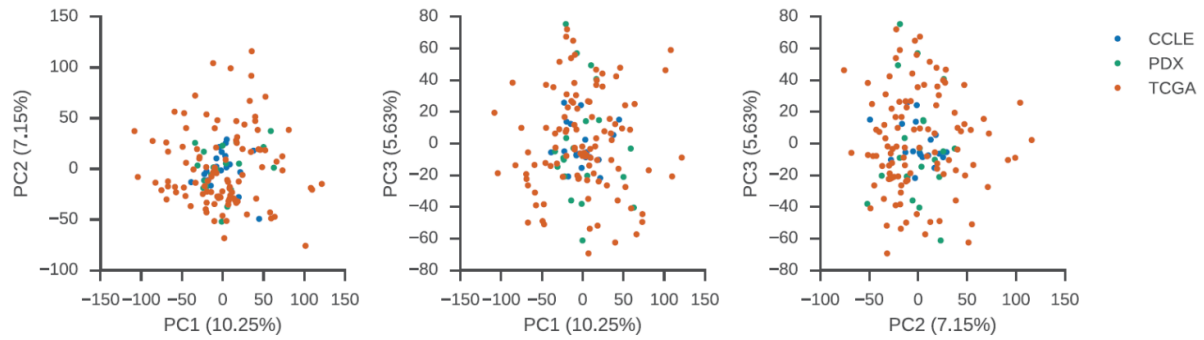**D**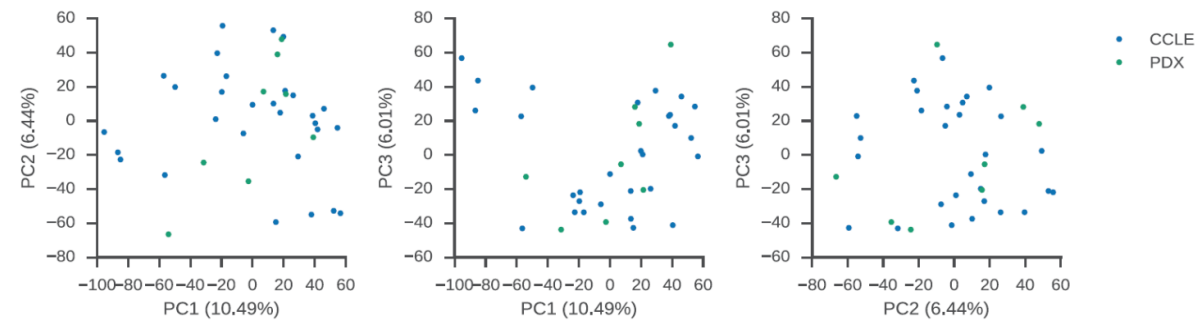

Shown above is batch effect correction for normalized gene expressions from multiple data sets, as performed separately for each primary tumor histology using the ComBat approach from SVA 3.18.0 (A – B-ALL, B – T-ALL, C-AML, D-Lymphoma). Hierarchical clustering with Ward's linkage and Euclidean distance over the 750 genes with highest variance-to-mean ratio was performed separately for each histology (with external datasets) and over all histologies (only PDX samples). Fusion genes were called with STAR-Fusion 0.4.0 (<https://star-fusion.github.io>). Evidence for fusions was measured by summing spanning fragments (read pairs that align on both sides of a breakpoint) and junction reads (reads that align over the breakpoint). Fusions with an evidence of at least 10 over all samples were retained, and further filtered manually to conservatively remove putative homology induced artifacts.

### **Hemoseq**

We analyzed the full coding sequences of a panel of 183 genes selected based on the presence of recurrent mutations in leukemia and lymphoma (Odejide et al., 2014; see **Table S2** for gene panel) in 115 PDX lines. Briefly, genomic DNA was extracted from banked xenografted tumor cells harvested from P0 (B-ALL) or  $\geq$ P1 mice (all other histologies) following immunomagnetic depletion of murine cells (EasySep Mouse/Human Chimera Isolation Kit, #19849, StemCell Technologies, Vancouver, BC, Canada). DNA underwent customized hybrid-capture target enrichment (SureSelect, Agilent, Santa Clara, CA, USA) and Illumina sequencing, as previously described (Odejide et al., 2014). Non-tumor DNA from remission peripheral blood, remission bone marrow, or saliva samples was also sequenced to exclude germ-line polymorphisms and platform-specific artifacts. Matched non-tumor samples were obtained from 45 of the 115 patients whose tumor-derived PDX lines were sequenced so as to facilitate filtering of somatic mutations. A panel-of-normals filter was subsequently generated from all 45 matched non-tumor controls. In addition, genomic DNA from the splenocytes of a normal NSG mouse was sequenced in order to enhance species-specific filtering of human reads. Sequencing reads were filtered using the NSG control and either the matched non-tumor sample, if available, or the panel-of-normals. Variants were rejected as germline artifacts if they were present in the matched non-tumor sample, if available; otherwise, they were rejected if present in two or more of the panel of normals. Known germline polymorphisms from the Exome Sequencing Project and the dbSNP (build 142) databases were also excluded. We applied the MutSigCV algorithm (Lawrence et al., 2013) to identify genes that were altered more often than expected by chance given the background mutation rate. We used the evolutionary conservation of the affected amino acid in protein homologues to predict the functional effect of detected variants. We only considered variants predicted to be non-silent (i.e., missense, nonsense, translational start site, or splice site alterations, or in-frame or frame-shift insertions/deletions) and with variant allele frequencies of 5% or more. For every alteration meeting these criteria, sequencing reads were individually visualized to evaluate mapping quality as well as the phase and spatial distribution of alterations within reads. Mutations were then called by cross-referencing candidate variants to ClinVar, COSMIC, and a review of published literature.

### **cDNA Production**

For cDNA synthesis, cDNA was generated using the SuperScript III kit (Life Technologies) according to manufacturers directions. *TP53* cDNA was amplified using KOD Xtreme™ (EMD Millipore) with the following primers: *TP53*-f CATGGAGGAGCCGCAGTCAGA and *TP53*-r TCAGTCTGAGTCAGGCCCTTCTGTC and purified by PCR purification (Qiagen).

### **NanoString**

All samples were assessed for quality and concentration using Agilent Bioanalyzer 2100. Capture, Reporter, and Plus product probes were hybridized to 100ng of total RNA at 65 deg C for 16hrs. Samples were washed and loaded onto a cartridge using the nCounter Analysis System Prep Station per the manufacturer's recommendations. The cartridge was scanned using the nCounter Digital Analyzer at the maximum resolution of 1150 FOV. One outlier from the NanoString analysis was the *TP53<sup>mut</sup>/CGM097*-resistant sample, 88178, designated (d) in **Figure 4**. This sample demonstrated no CGM097-dependent gene expression in PD samples or the moribund-vehicle treated sample. However, expression of CGM097 was unexpectedly elevated in the CGM097-treated moribund sample. It is unclear how a sample with no CGM097-dependent gene expression at the PD time point would gain the activity over time. It is also unclear how a sample with a *TP53* mutation would demonstrate CGM097-dependent gene expression in any setting. However, western blotting demonstrated the expected pattern of elevated p53 expression with no p21 expression in both vehicle- and CGM097-treated moribund samples. Unlike all other PDXs, the data from the western blot is dissimilar to the data from Nanostring. This suggests that the sample analyzed by Nanostring may be different due to experimenter error.

### **FACS-based dynamic BH3 profiling**

Dynamic BH3 profiling was performed as previously described (Montero et al., 2015; Pan et al., 2014; Ryan and Letai, 2013; Ryan et al., 2010). Briefly, B-ALL PDXs cells were incubated for 16 hours with 2 $\mu$ M CGM097 or DMSO in RPMI; then were pelleted at 500xg for 5 minutes, and resuspended in 100  $\mu$ L PBS stained with 1 $\mu$ L per 10<sup>6</sup> cells of Live/Dead staining (Zombie Aqua dye, Biolegend) 20 min on ice. Cells were again pelleted at 500xg for 5 minutes, washed with PBS and resuspended in 100  $\mu$ L 2% BSA/HBSS with human CD45 antibody (BD Horizon, BV421 clone HI30) 1:50 dilution, and human CD19 antibody (BDPharmingen PECy7 clone SJ25C1) 1:50 dilution for 30 minutes on ice, washed with PBS, and resuspended in DTEB buffer (Ryan et al., 2010) at a density of 1x10<sup>6</sup> cells/mL. 25  $\mu$ L of cell suspension was added to each well containing 25  $\mu$ L of DTEB buffer containing 20  $\mu$ g/mL Digitonin and peptides at twice their final concentration. Cells were incubated at room temperature for 60 minutes before terminating the exposure with 50  $\mu$ L of 4% formaldehyde in PBS for 15 minutes at room temperature. Formaldehyde was then neutralized with 50  $\mu$ L of N2 Buffer (1.7 M Tris, 1.25M glycine, pH 9.1) for 15 minutes at room temperature. To stain for retained cytochrome C, anti-cytochrome C clone 6H2.B4 conjugated to Alexafluor 488 (BD Bioscience) was diluted 1:50 into 10X stain buffer (1% Saponin, 10%BSA, 20%FBS in PBS) and 20  $\mu$ L of this antibody/stain mixture was added to each well for a final antibody dilution of 1:360. Cells were stained overnight at 4°C and flow cytometry data acquired using a BD FACS Canto II.

### **Histology and Immunohistochemistry**

Human specimens were fixed in 10% neutral-buffered formalin or B-plus fixative for up to 24 hours before paraffin embedding. Mouse PDX specimens were fixed in 10% neutral-buffered formalin for 48 hours and stored in 70% ethanol for up to 2 weeks before paraffin embedding. Immunohistochemical studies were performed on 4 micron paraffin sections using the following antibodies: CD3 (1:300; clone LN10, Leica Biosystems, Buffalo Grove, IL), CD20 (1:500; clone L26, Dako, Carpinteria, CA), PD-1 (1:100; clone NAT105, Cell Marque, Rocklin, CA), CD19 (1:150; clone BT51E, Leica), CD10 (1:80; clone 56C6, Leica), CD30 (1:75; clone Ber-H2, Dako), CD4 (1:100; clone EPR6855, Epitomics, Burlingame, CA), CD7 (1:100; clone CD7-272, Leica), CD8 (1:200; clone C8/144B, Dako), CD5 (1:400; clone 4C7, Leica), BCL2 (1:200; clone 124, Dako), TdT (1:100; clone SEN28, Leica), cyclin D1 (1:30; clone EPR2241, Thermo Scientific), PAX5 (1:100; clone 610863, BD, Franklin Lakes, NJ), and CD56 (1:50; clone 123C3, Dako). In situ hybridization for Epstein-Barr virus encoded RNA (EBER) was performed using the Ventana system (Tucson, AZ).

### **Clonality**

Eight five-micron sections of formalin-fixed tissue were cut from paraffin blocks of each sample. The slides were scraped and DNA was isolated using the QIAamp DNA Mini Kit (QIAGEN, Valencia, CA). Human T-cell receptor gamma gene and immunoglobulin heavy chain gene rearrangement evaluation was performed per the BIOMED-2 protocol (van Dongen JJM et al. Leukemia. 2003, 17(12):2257-2317).

## Supplemental References

Dobin, A., Davis, C.A., Schlesinger, F., Drenkow, J., Zaleski, C., Jha, S., Batut, P., Chaisson, M., and Gingeras, T.R. (2013). STAR: ultrafast universal RNA-seq aligner. *Bioinformatics* 29, 15-21.

Grimwade, D., Hills, R.K., Moorman, A.V., Walker, H., Chatters, S., Goldstone, A.H., Wheatley, K., Harrison, C.J., Burnett, A.K., and National Cancer Research Institute Adult Leukaemia Working, G. (2010). Refinement of cytogenetic classification in acute myeloid leukemia: determination of prognostic significance of rare recurring chromosomal abnormalities among 5876 younger adult patients treated in the United Kingdom Medical Research Council trials. *Blood* 116, 354-365.

Lawrence, M.S., Stojanov, P., Polak, P., Kryukov, G.V., Cibulskis, K., Sivachenko, A., Carter, S.L., Stewart, C., Mermel, C.H., Roberts, S.A., *et al.* (2013). Mutational heterogeneity in cancer and the search for new cancer-associated genes. *Nature* 499, 214-218.

Pan, R., Hogdal, L.J., Benito, J.M., Bucci, D., Han, L., Borthakur, G., Cortes, J., DeAngelo, D.J., Debose, L., Mu, H., *et al.* (2014). Selective BCL-2 inhibition by ABT-199 causes on-target cell death in acute myeloid leukemia. *Cancer Discov* 4, 362-375.

Ryan, J., and Letai, A. (2013). BH3 profiling in whole cells by fluorimeter or FACS. *Methods* 61, 156-164.

Ryan, J.A., Brunelle, J.K., and Letai, A. (2010). Heightened mitochondrial priming is the basis for apoptotic hypersensitivity of CD4<sup>+</sup> CD8<sup>+</sup> thymocytes. *Proceedings of the National Academy of Sciences of the United States of America* 107, 12895-12900.

Trapnell, C., Williams, B.A., Pertea, G., Mortazavi, A., Kwan, G., van Baren, M.J., Salzberg, S.L., Wold, B.J., and Pachter, L. (2010). Transcript assembly and quantification by RNA-Seq reveals unannotated transcripts and isoform switching during cell differentiation. *Nat Biotechnol* 28, 511-515.
